# Supplementary material for: Structural control on the Tohoku earthquake rupture process investigated by 3D FEM, tsunami and geodetic data
Source: PubMed Central journal article supplement — Sci Rep. 2014 Jul 9;4:5631. doi: 10.1038/srep05631 (PMC4087921; doi:10.1038/srep05631), 2014-07-09
Supplement: srep05631-s1.pdf [file srep05631-s1.pdf]

## **Supplementary Information**

### **Structural control on the Tohoku earthquake rupture process investigated by 3D FEM, tsunami and geodetic data**

F. Romano<sup>1</sup>, E. Trasatti<sup>1</sup>, S. Lorito<sup>1</sup>, C. Piromallo<sup>1</sup>, A. Piatanesi<sup>1</sup>, Y. Ito<sup>2</sup>, D. Zhao<sup>3</sup>,  
K. Hirata<sup>4</sup>, P. Lanucara<sup>5</sup>, and M. Cocco<sup>1</sup>

<sup>1</sup> Istituto Nazionale di Geofisica e Vulcanologia, Rome, Italy

<sup>2</sup> Disaster Prevention Research Institute, Kyoto University, Japan

<sup>3</sup> Department of Geophysics, Tohoku University, Sendai, Japan

<sup>4</sup> National Research Institute for Earth Science and Disaster Prevention, Ibaraki, Japan

<sup>5</sup> CINECA, SuperComputing Applications and Innovation Department - SCAI, Rome, Italy

February 2014, *Submission to Scientific Reports*

June 2014, *Revised version*

### **Supplementary Information. Note S1 –Inversion Technique.**

We follow a robust joint inversion scheme adopted in several previous papers<sup>1-6</sup> to retrieve the coseismic slip distribution (including the slip direction, i.e. the rake angle) of the 2011 Tohoku-oki earthquake. The inverse problem is solved by using the method of Green's functions superposition and the Heat Bath algorithm<sup>7</sup>, a particular implementation of Simulated Annealing technique<sup>8</sup>. Two different cost functions for tsunami and geodetic data are used. For tsunami data we use a function that results to be sensitive in matching both phases and amplitudes of the time series<sup>9</sup>. Instead, a standard L2 norm is used for the geodetic data set.

Previous studies on the Tohoku earthquake highlighted the importance of having tsunami and geodetic data just above the source (e.g. TM1 and TM2 sensors, and seafloor observations in Figure 1b in the Manuscript) in order to better constrain the earthquake slip distribution<sup>6,10</sup>. Hence, different weights are assigned to each tsunami and geodetic station. The weights of tsunami stations vary with their location, in order to take into account the spatial and azimuthal instrumental coverage, and especially the distance from the earthquake source. We also assign different weights to geodetic data paying particular attention to the seafloor geodetic stations because they are positioned just above the seismic source. In addition, due to the different behaviour of the cost functions for tsunami and geodetic data, we further assign different weights to both the entire data sets in order to avoid a possible unbalancing of the cost functions during the joint inversion. This procedure is not immediate and simple to face; therefore we chose the appropriate weight values after performing several tests.

The slip distribution is obtained through a global search technique and then the solution of this inverse problem is intrinsically non-unique. Thus, we compute and show the average slip model that we consider more representative than the best fitting solution. The average slip model is calculated as a weighted mean of a subset of the explored models. This subset consists of the models with the lowest cost functions (0.5% of the total) and which fit satisfactorily the data. The weights are the inverse of the cost function, thus the better models count more with respect to the

others. The dispersion of the model parameters around their average values is assessed by performing an a-posteriori analysis of the explored models ensemble<sup>1-6</sup> where the weighted standard deviation is taken as the error in the corresponding parameter. In this analysis the coefficient of variation (i.e. the standard deviation divided by the average slip value) is also computed for each subfault parameter (see Figure 3c in main text). During the global search the algorithm explores the slip values for each subfault in the range 0-60 meters at 1 meter steps. The rake is kept constant on large blocks (cyan lines in Supplementary Figure S2). The range of variation for the rake values during the inversion is 75°-110° at 5° steps. Numerical values and standard deviations for the average and best models are reported in Supplementary Table S3. Subfaults are numbered following the order shown in Supplementary Figure S2.

#### **Supplementary Information. Note S2 – Details of Tsunami Data.**

Tsunami waves generated by the Tohoku earthquake have been recorded by many instruments positioned near the Japanese coasts (GPS-buoys, coastal wave gauges, bottom pressure sensors), above the source area (bottom pressure sensors) and in the open ocean (DART buoys). In particular, GPS-buoys<sup>11</sup> and coastal wave gauges<sup>12</sup>, positioned ~20 km off the coasts, are provided by Nationwide Ocean Wave information network for Ports and Harbours (NOWPHAS); bottom pressure sensors are provided by Japan Agency for Marine-Earth Science and Technology (JAMSTEC) Kushiro–Tokachi and Muroto cabled observatories<sup>13,14</sup>, by Japan Meteorological Agency (JMA) Tokai and Boso cabled observatories<sup>15</sup>, by the Earthquake Research Institute (ERI), University of Tokyo, Sanriku cabled observatory<sup>16</sup>, and by Tohoku University<sup>17</sup>; DART buoys are acquired by National Oceanic and Atmospheric Administration (NOAA), and by Russian Far Eastern Regional Hydrometeorological Research Institute (RFERHRI). The original signals include the tide and in some cases the surface waves generated by the earthquake. Tides are removed by using a procedure based on robust LOWESS<sup>18</sup>.

**Supplementary Table S1 - Density values characterizing the layers of the 3D FEM model.**

| <b>Layer</b>      | <b>Density (kg/m<sup>3</sup>)</b> |
|-------------------|-----------------------------------|
| <i>Prism</i>      | 2500 <sup>1,3</sup>               |
| <i>Crust sup</i>  | 2500 <sup>1</sup>                 |
| <i>Crust inf</i>  | 2800 <sup>1</sup>                 |
| <i>Crust oce</i>  | 2800 <sup>1</sup>                 |
| <i>Mantle con</i> | 3000 <sup>1</sup>                 |
| <i>Mantle oce</i> | 3200 <sup>1,2</sup>               |
| <i>Slab sup</i>   | 3000 <sup>1</sup>                 |
| <i>Slab inf</i>   | 3300 <sup>2</sup>                 |

<sup>1</sup> From ref. 19.

<sup>2</sup> From ref. 20.

<sup>3</sup> The density is not used to compute the elastic constants of the layer ( $\mu = 5$  GPa, Poisson ratio = 0.33)<sup>21,22</sup>.

**Supplementary Table S2 - Fault model.**

|            | Upper Right |            | Upper Left |            | Bottom Left |            | Bottom Right |            |                                   |               |            |
|------------|-------------|------------|------------|------------|-------------|------------|--------------|------------|-----------------------------------|---------------|------------|
| Subf.<br># | Lon<br>(°)  | Lat<br>(°) | Lon<br>(°) | Lat<br>(°) | Lon<br>(°)  | Lat<br>(°) | Lon<br>(°)   | Lat<br>(°) | Center<br>Depth<br>(km<br>b.s.l.) | Strike<br>(°) | Dip<br>(°) |
| 1A         | 144.33      | 40.23      | 144.27     | 40.08      | 144.15      | 40.11      | 144.21       | 40.26      | 9.458                             | 196.1         | 2.3        |
| 2A         | 144.27      | 40.08      | 144.24     | 39.92      | 144.12      | 39.95      | 144.15       | 40.11      | 9.734                             | 188.5         | 2.6        |
| 3A         | 144.24      | 39.92      | 144.21     | 39.76      | 144.09      | 39.79      | 144.12       | 39.95      | 9.702                             | 188.2         | 2.7        |
| 4A         | 144.21      | 39.76      | 144.20     | 39.60      | 144.08      | 39.63      | 144.09       | 39.79      | 9.404                             | 184.0         | 2.5        |
| 5A         | 144.20      | 39.60      | 144.20     | 39.44      | 144.08      | 39.47      | 144.08       | 39.63      | 9.018                             | 180.1         | 2.2        |
| 6A         | 144.20      | 39.44      | 144.18     | 39.28      | 144.06      | 39.31      | 144.08       | 39.47      | 8.732                             | 185.2         | 1.6        |
| 7A         | 144.18      | 39.28      | 144.17     | 39.12      | 144.05      | 39.15      | 144.06       | 39.31      | 8.562                             | 182.6         | 1.4        |
| 8A         | 144.17      | 39.12      | 144.12     | 38.97      | 144.01      | 39.00      | 144.05       | 39.15      | 8.480                             | 193.8         | 1.3        |
| 9A         | 144.12      | 38.97      | 144.06     | 38.81      | 143.95      | 38.84      | 144.01       | 39.00      | 8.495                             | 195.8         | 1.7        |
| 10A        | 144.06      | 38.81      | 144.03     | 38.65      | 143.91      | 38.69      | 143.95       | 38.84      | 8.552                             | 190.0         | 2.3        |
| 11A        | 144.03      | 38.65      | 143.99     | 38.50      | 143.88      | 38.53      | 143.91       | 38.69      | 8.611                             | 190.3         | 2.6        |
| 12A        | 143.99      | 38.50      | 143.96     | 38.34      | 143.84      | 38.37      | 143.88       | 38.53      | 8.616                             | 190.0         | 2.9        |
| 13A        | 143.96      | 38.34      | 143.91     | 38.18      | 143.80      | 38.21      | 143.84       | 38.37      | 8.550                             | 192.3         | 3.0        |
| 14A        | 143.91      | 38.18      | 143.86     | 38.03      | 143.75      | 38.06      | 143.80       | 38.21      | 8.489                             | 193.4         | 3.4        |
| 15A        | 143.86      | 38.03      | 143.86     | 37.87      | 143.74      | 37.90      | 143.75       | 38.06      | 8.472                             | 182.6         | 3.2        |
| 16A        | 143.86      | 37.87      | 143.81     | 37.71      | 143.70      | 37.74      | 143.74       | 37.90      | 8.675                             | 193.0         | 2.6        |
| 17A        | 143.81      | 37.71      | 143.76     | 37.55      | 143.65      | 37.59      | 143.70       | 37.74      | 9.094                             | 194.5         | 2.2        |
| 18A        | 143.76      | 37.55      | 143.69     | 37.40      | 143.58      | 37.44      | 143.65       | 37.59      | 9.522                             | 200.4         | 2.1        |
| 19A        | 143.69      | 37.40      | 143.61     | 37.26      | 143.50      | 37.29      | 143.58       | 37.44      | 10.004                            | 203.8         | 2.3        |
| 20A        | 143.61      | 37.26      | 143.54     | 37.11      | 143.42      | 37.14      | 143.50       | 37.29      | 10.553                            | 200.9         | 3.1        |
| 21A        | 143.54      | 37.11      | 143.45     | 36.96      | 143.34      | 36.99      | 143.42       | 37.14      | 11.085                            | 204.3         | 3.8        |
| 22A        | 143.45      | 36.96      | 143.38     | 36.81      | 143.26      | 36.85      | 143.34       | 36.99      | 11.413                            | 202.3         | 4.6        |
| 23A        | 143.38      | 36.81      | 143.29     | 36.67      | 143.17      | 36.70      | 143.26       | 36.85      | 11.409                            | 207.0         | 4.9        |
| 24A        | 143.29      | 36.67      | 143.16     | 36.55      | 143.05      | 36.58      | 143.17       | 36.70      | 11.266                            | 218.0         | 4.7        |
| 25A        | 143.16      | 36.55      | 143.06     | 36.41      | 142.95      | 36.44      | 143.05       | 36.58      | 11.028                            | 212.0         | 4.9        |
| 26A        | 143.06      | 36.41      | 142.97     | 36.27      | 142.86      | 36.30      | 142.95       | 36.44      | 10.602                            | 206.1         | 4.8        |
| 27A        | 142.97      | 36.27      | 142.86     | 36.13      | 142.75      | 36.17      | 142.86       | 36.30      | 10.098                            | 213.1         | 4.6        |
| 28A        | 142.86      | 36.13      | 142.70     | 36.05      | 142.58      | 36.08      | 142.75       | 36.17      | 9.866                             | 238.2         | 4.1        |
| 29A        | 142.70      | 36.05      | 142.55     | 35.94      | 142.44      | 35.97      | 142.58       | 36.08      | 9.865                             | 228.3         | 4.4        |
| 30A        | 142.55      | 35.94      | 142.48     | 35.80      | 142.37      | 35.82      | 142.44       | 35.97      | 9.676                             | 201.3         | 5.3        |
| 31A        | 142.48      | 35.80      | 142.42     | 35.64      | 142.31      | 35.67      | 142.37       | 35.82      | 9.455                             | 195.8         | 5.4        |
| 1B         | 144.21      | 40.26      | 144.15     | 40.11      | 144.04      | 40.14      | 144.09       | 40.30      | 10.027                            | 195.9         | 3.6        |
| 2B         | 144.15      | 40.11      | 144.12     | 39.95      | 144.00      | 39.98      | 144.04       | 40.14      | 10.347                            | 188.7         | 3.8        |
| 3B         | 144.12      | 39.95      | 144.09     | 39.79      | 143.98      | 39.83      | 144.00       | 39.98      | 10.339                            | 188.0         | 4.1        |
| 4B         | 144.09      | 39.79      | 144.08     | 39.63      | 143.96      | 39.67      | 143.98       | 39.83      | 10.010                            | 183.8         | 4.4        |
| 5B         | 144.08      | 39.63      | 144.08     | 39.47      | 143.96      | 39.51      | 143.96       | 39.67      | 9.537                             | 180.0         | 4.0        |
| 6B         | 144.08      | 39.47      | 144.06     | 39.31      | 143.95      | 39.35      | 143.96       | 39.51      | 9.167                             | 184.6         | 3.4        |
| 7B         | 144.06      | 39.31      | 144.05     | 39.15      | 143.94      | 39.19      | 143.95       | 39.35      | 8.957                             | 182.8         | 3.1        |

|     |        |       |        |       |        |       |        |       |        |       |     |
|-----|--------|-------|--------|-------|--------|-------|--------|-------|--------|-------|-----|
| 8B  | 144.05 | 39.15 | 144.01 | 39.00 | 143.89 | 39.03 | 143.94 | 39.19 | 8.892  | 193.6 | 2.9 |
| 9B  | 144.01 | 39.00 | 143.95 | 38.84 | 143.84 | 38.88 | 143.89 | 39.03 | 8.969  | 195.8 | 3.1 |
| 10B | 143.95 | 38.84 | 143.91 | 38.69 | 143.80 | 38.72 | 143.84 | 38.88 | 9.086  | 190.3 | 3.3 |
| 11B | 143.91 | 38.69 | 143.88 | 38.53 | 143.76 | 38.56 | 143.80 | 38.72 | 9.196  | 190.1 | 3.4 |
| 12B | 143.88 | 38.53 | 143.84 | 38.37 | 143.73 | 38.40 | 143.76 | 38.56 | 9.252  | 190.1 | 3.7 |
| 13B | 143.84 | 38.37 | 143.80 | 38.21 | 143.68 | 38.25 | 143.73 | 38.40 | 9.230  | 192.3 | 4.1 |
| 14B | 143.80 | 38.21 | 143.75 | 38.06 | 143.64 | 38.09 | 143.68 | 38.25 | 9.176  | 192.9 | 4.1 |
| 15B | 143.75 | 38.06 | 143.74 | 37.90 | 143.63 | 37.93 | 143.64 | 38.09 | 9.104  | 183.0 | 4.2 |
| 16B | 143.74 | 37.90 | 143.70 | 37.74 | 143.59 | 37.77 | 143.63 | 37.93 | 9.222  | 192.5 | 3.7 |
| 17B | 143.70 | 37.74 | 143.65 | 37.59 | 143.53 | 37.62 | 143.59 | 37.77 | 9.593  | 194.5 | 3.3 |
| 18B | 143.65 | 37.59 | 143.58 | 37.44 | 143.47 | 37.47 | 143.53 | 37.62 | 10.049 | 200.3 | 3.2 |
| 19B | 143.58 | 37.44 | 143.50 | 37.29 | 143.39 | 37.32 | 143.47 | 37.47 | 10.618 | 203.6 | 3.9 |
| 20B | 143.50 | 37.29 | 143.42 | 37.14 | 143.31 | 37.17 | 143.39 | 37.32 | 11.285 | 201.0 | 4.2 |
| 21B | 143.42 | 37.14 | 143.34 | 36.99 | 143.23 | 37.03 | 143.31 | 37.17 | 11.942 | 204.0 | 4.8 |
| 22B | 143.34 | 36.99 | 143.26 | 36.85 | 143.15 | 36.88 | 143.23 | 37.03 | 12.364 | 202.6 | 5.4 |
| 23B | 143.26 | 36.85 | 143.17 | 36.70 | 143.06 | 36.74 | 143.15 | 36.88 | 12.402 | 207.3 | 5.7 |
| 24B | 143.17 | 36.70 | 143.05 | 36.58 | 142.94 | 36.61 | 143.06 | 36.74 | 12.257 | 217.1 | 5.9 |
| 25B | 143.05 | 36.58 | 142.95 | 36.44 | 142.84 | 36.47 | 142.94 | 36.61 | 11.999 | 211.4 | 6.0 |
| 26B | 142.95 | 36.44 | 142.86 | 36.30 | 142.75 | 36.33 | 142.84 | 36.47 | 11.553 | 206.8 | 6.0 |
| 27B | 142.86 | 36.30 | 142.75 | 36.17 | 142.63 | 36.20 | 142.75 | 36.33 | 11.049 | 214.3 | 5.7 |
| 28B | 142.75 | 36.17 | 142.58 | 36.08 | 142.47 | 36.11 | 142.63 | 36.20 | 10.840 | 236.7 | 5.7 |
| 29B | 142.58 | 36.08 | 142.44 | 35.97 | 142.34 | 36.00 | 142.47 | 36.11 | 10.899 | 227.1 | 6.4 |
| 30B | 142.44 | 35.97 | 142.37 | 35.82 | 142.26 | 35.85 | 142.34 | 36.00 | 10.769 | 202.3 | 7.0 |
| 31B | 142.37 | 35.82 | 142.31 | 35.67 | 142.20 | 35.70 | 142.26 | 35.85 | 10.578 | 196.3 | 6.6 |
| 1C  | 144.09 | 40.30 | 144.04 | 40.14 | 143.92 | 40.17 | 143.98 | 40.33 | 10.852 | 195.5 | 5.2 |
| 2C  | 144.04 | 40.14 | 144.00 | 39.98 | 143.89 | 40.02 | 143.92 | 40.17 | 11.218 | 189.2 | 5.2 |
| 3C  | 144.00 | 39.98 | 143.98 | 39.83 | 143.86 | 39.86 | 143.89 | 40.02 | 11.262 | 187.4 | 5.6 |
| 4C  | 143.98 | 39.83 | 143.96 | 39.67 | 143.85 | 39.70 | 143.86 | 39.86 | 10.925 | 183.5 | 5.7 |
| 5C  | 143.96 | 39.67 | 143.96 | 39.51 | 143.85 | 39.54 | 143.85 | 39.70 | 10.375 | 180.2 | 5.7 |
| 6C  | 143.96 | 39.51 | 143.95 | 39.35 | 143.84 | 39.38 | 143.85 | 39.54 | 9.909  | 183.6 | 5.1 |
| 7C  | 143.95 | 39.35 | 143.94 | 39.19 | 143.82 | 39.22 | 143.84 | 39.38 | 9.632  | 183.3 | 4.7 |
| 8C  | 143.94 | 39.19 | 143.89 | 39.03 | 143.78 | 39.06 | 143.82 | 39.22 | 9.549  | 193.2 | 4.3 |
| 9C  | 143.89 | 39.03 | 143.84 | 38.88 | 143.72 | 38.91 | 143.78 | 39.06 | 9.644  | 195.8 | 4.2 |
| 10C | 143.84 | 38.88 | 143.80 | 38.72 | 143.68 | 38.75 | 143.72 | 38.91 | 9.793  | 190.8 | 4.3 |
| 11C | 143.80 | 38.72 | 143.76 | 38.56 | 143.65 | 38.59 | 143.68 | 38.75 | 9.940  | 189.8 | 4.3 |
| 12C | 143.76 | 38.56 | 143.73 | 38.40 | 143.61 | 38.44 | 143.65 | 38.59 | 10.062 | 190.3 | 4.6 |
| 13C | 143.73 | 38.40 | 143.68 | 38.25 | 143.57 | 38.28 | 143.61 | 38.44 | 10.100 | 192.4 | 5.1 |
| 14C | 143.68 | 38.25 | 143.64 | 38.09 | 143.53 | 38.12 | 143.57 | 38.28 | 10.046 | 191.9 | 5.3 |
| 15C | 143.64 | 38.09 | 143.63 | 37.93 | 143.51 | 37.96 | 143.53 | 38.12 | 9.927  | 183.8 | 5.2 |
| 16C | 143.63 | 37.93 | 143.59 | 37.77 | 143.48 | 37.81 | 143.51 | 37.96 | 9.975  | 191.5 | 4.8 |
| 17C | 143.59 | 37.77 | 143.53 | 37.62 | 143.42 | 37.65 | 143.48 | 37.81 | 10.314 | 194.6 | 4.5 |
| 18C | 143.53 | 37.62 | 143.47 | 37.47 | 143.35 | 37.50 | 143.42 | 37.65 | 10.821 | 200.2 | 4.7 |
| 19C | 143.47 | 37.47 | 143.39 | 37.32 | 143.28 | 37.36 | 143.35 | 37.50 | 11.462 | 203.3 | 5.1 |
| 20C | 143.39 | 37.32 | 143.31 | 37.17 | 143.20 | 37.21 | 143.28 | 37.36 | 12.203 | 201.4 | 5.4 |
| 21C | 143.31 | 37.17 | 143.23 | 37.03 | 143.12 | 37.06 | 143.20 | 37.21 | 12.947 | 203.4 | 5.7 |
| 22C | 143.23 | 37.03 | 143.15 | 36.88 | 143.04 | 36.91 | 143.12 | 37.06 | 13.451 | 203.2 | 6.2 |
| 23C | 143.15 | 36.88 | 143.06 | 36.74 | 142.95 | 36.77 | 143.04 | 36.91 | 13.563 | 208.1 | 6.4 |
| 24C | 143.06 | 36.74 | 142.94 | 36.61 | 142.84 | 36.64 | 142.95 | 36.77 | 13.439 | 215.3 | 6.7 |
| 25C | 142.94 | 36.61 | 142.84 | 36.47 | 142.74 | 36.50 | 142.84 | 36.64 | 13.145 | 210.4 | 7.0 |
| 26C | 142.84 | 36.47 | 142.75 | 36.33 | 142.64 | 36.36 | 142.74 | 36.50 | 12.694 | 208.3 | 6.9 |

|     |        |       |        |       |        |       |        |       |        |       |     |
|-----|--------|-------|--------|-------|--------|-------|--------|-------|--------|-------|-----|
| 27C | 142.75 | 36.33 | 142.63 | 36.20 | 142.52 | 36.24 | 142.64 | 36.36 | 12.244 | 216.7 | 6.9 |
| 28C | 142.63 | 36.20 | 142.47 | 36.11 | 142.37 | 36.14 | 142.52 | 36.24 | 12.109 | 233.6 | 6.8 |
| 29C | 142.47 | 36.11 | 142.34 | 36.00 | 142.23 | 36.02 | 142.37 | 36.14 | 12.194 | 224.7 | 7.9 |
| 30C | 142.34 | 36.00 | 142.26 | 35.85 | 142.14 | 35.88 | 142.23 | 36.02 | 12.096 | 204.5 | 8.1 |
| 31C | 142.26 | 35.85 | 142.20 | 35.70 | 142.08 | 35.73 | 142.14 | 35.88 | 11.946 | 197.5 | 8.2 |
| 1D  | 143.98 | 40.33 | 143.92 | 40.17 | 143.80 | 40.20 | 143.86 | 40.36 | 11.937 | 195.1 | 6.6 |
| 2D  | 143.92 | 40.17 | 143.89 | 40.02 | 143.77 | 40.05 | 143.80 | 40.20 | 12.326 | 189.7 | 6.5 |
| 3D  | 143.89 | 40.02 | 143.86 | 39.86 | 143.74 | 39.89 | 143.77 | 40.05 | 12.417 | 186.9 | 6.6 |
| 4D  | 143.86 | 39.86 | 143.85 | 39.70 | 143.73 | 39.73 | 143.74 | 39.89 | 12.075 | 183.1 | 6.9 |
| 5D  | 143.85 | 39.70 | 143.85 | 39.54 | 143.73 | 39.57 | 143.73 | 39.73 | 11.467 | 180.4 | 6.6 |
| 6D  | 143.85 | 39.54 | 143.84 | 39.38 | 143.73 | 39.41 | 143.73 | 39.57 | 10.913 | 182.4 | 6.3 |
| 7D  | 143.84 | 39.38 | 143.82 | 39.22 | 143.71 | 39.25 | 143.73 | 39.41 | 10.551 | 183.9 | 5.9 |
| 8D  | 143.82 | 39.22 | 143.78 | 39.06 | 143.67 | 39.09 | 143.71 | 39.25 | 10.428 | 192.7 | 5.4 |
| 9D  | 143.78 | 39.06 | 143.72 | 38.91 | 143.61 | 38.94 | 143.67 | 39.09 | 10.533 | 195.9 | 5.4 |
| 10D | 143.72 | 38.91 | 143.68 | 38.75 | 143.57 | 38.78 | 143.61 | 38.94 | 10.703 | 191.5 | 5.7 |
| 11D | 143.68 | 38.75 | 143.65 | 38.59 | 143.53 | 38.63 | 143.57 | 38.78 | 10.871 | 189.4 | 5.5 |
| 12D | 143.65 | 38.59 | 143.61 | 38.44 | 143.50 | 38.47 | 143.53 | 38.63 | 11.047 | 190.6 | 5.7 |
| 13D | 143.61 | 38.44 | 143.57 | 38.28 | 143.45 | 38.31 | 143.50 | 38.47 | 11.171 | 192.5 | 5.9 |
| 14D | 143.57 | 38.28 | 143.53 | 38.12 | 143.42 | 38.16 | 143.45 | 38.31 | 11.150 | 190.8 | 6.6 |
| 15D | 143.53 | 38.12 | 143.51 | 37.96 | 143.40 | 38.00 | 143.42 | 38.16 | 10.996 | 184.7 | 6.8 |
| 16D | 143.51 | 37.96 | 143.48 | 37.81 | 143.36 | 37.84 | 143.40 | 38.00 | 10.985 | 190.3 | 6.4 |
| 17D | 143.48 | 37.81 | 143.42 | 37.65 | 143.31 | 37.69 | 143.36 | 37.84 | 11.286 | 194.8 | 6.2 |
| 18D | 143.42 | 37.65 | 143.35 | 37.50 | 143.24 | 37.54 | 143.31 | 37.69 | 11.812 | 200.0 | 5.9 |
| 19D | 143.35 | 37.50 | 143.28 | 37.36 | 143.17 | 37.39 | 143.24 | 37.54 | 12.496 | 203.0 | 6.0 |
| 20D | 143.28 | 37.36 | 143.20 | 37.21 | 143.09 | 37.24 | 143.17 | 37.39 | 13.287 | 201.9 | 6.3 |
| 21D | 143.20 | 37.21 | 143.12 | 37.06 | 143.01 | 37.09 | 143.09 | 37.24 | 14.082 | 202.7 | 6.4 |
| 22D | 143.12 | 37.06 | 143.04 | 36.91 | 142.93 | 36.95 | 143.01 | 37.09 | 14.663 | 204.0 | 6.6 |
| 23D | 143.04 | 36.91 | 142.95 | 36.77 | 142.83 | 36.81 | 142.93 | 36.95 | 14.870 | 209.0 | 7.2 |
| 24D | 142.95 | 36.77 | 142.84 | 36.64 | 142.73 | 36.67 | 142.83 | 36.81 | 14.757 | 213.1 | 7.4 |
| 25D | 142.84 | 36.64 | 142.74 | 36.50 | 142.63 | 36.53 | 142.73 | 36.67 | 14.420 | 209.3 | 7.4 |
| 26D | 142.74 | 36.50 | 142.64 | 36.36 | 142.53 | 36.40 | 142.63 | 36.53 | 14.011 | 210.0 | 7.6 |
| 27D | 142.64 | 36.36 | 142.52 | 36.24 | 142.40 | 36.28 | 142.53 | 36.40 | 13.670 | 219.4 | 8.1 |
| 28D | 142.52 | 36.24 | 142.37 | 36.14 | 142.26 | 36.17 | 142.40 | 36.28 | 13.610 | 230.0 | 8.2 |
| 29D | 142.37 | 36.14 | 142.23 | 36.02 | 142.13 | 36.05 | 142.26 | 36.17 | 13.704 | 222.1 | 8.8 |
| 30D | 142.23 | 36.02 | 142.14 | 35.88 | 142.03 | 35.91 | 142.13 | 36.05 | 13.645 | 207.0 | 9.4 |
| 31D | 142.14 | 35.88 | 142.08 | 35.73 | 141.97 | 35.76 | 142.03 | 35.91 | 13.552 | 198.8 | 9.2 |
| 1E  | 143.86 | 40.36 | 143.80 | 40.20 | 143.69 | 40.23 | 143.74 | 40.39 | 13.278 | 194.7 | 8.0 |
| 2E  | 143.80 | 40.20 | 143.77 | 40.05 | 143.65 | 40.08 | 143.69 | 40.23 | 13.677 | 190.2 | 8.0 |
| 3E  | 143.77 | 40.05 | 143.74 | 39.89 | 143.63 | 39.92 | 143.65 | 40.08 | 13.810 | 186.4 | 8.2 |
| 4E  | 143.74 | 39.89 | 143.73 | 39.73 | 143.62 | 39.76 | 143.63 | 39.92 | 13.476 | 182.7 | 8.4 |
| 5E  | 143.73 | 39.73 | 143.73 | 39.57 | 143.62 | 39.60 | 143.62 | 39.76 | 12.815 | 180.6 | 8.5 |
| 6E  | 143.73 | 39.57 | 143.73 | 39.41 | 143.61 | 39.44 | 143.62 | 39.60 | 12.154 | 181.4 | 7.8 |
| 7E  | 143.73 | 39.41 | 143.71 | 39.25 | 143.60 | 39.28 | 143.61 | 39.44 | 11.698 | 184.4 | 7.1 |
| 8E  | 143.71 | 39.25 | 143.67 | 39.09 | 143.55 | 39.12 | 143.60 | 39.28 | 11.543 | 192.3 | 6.8 |
| 9E  | 143.67 | 39.09 | 143.61 | 38.94 | 143.50 | 38.97 | 143.55 | 39.12 | 11.670 | 196.0 | 6.7 |
| 10E | 143.61 | 38.94 | 143.57 | 38.78 | 143.45 | 38.82 | 143.50 | 38.97 | 11.887 | 192.1 | 7.1 |
| 11E | 143.57 | 38.78 | 143.53 | 38.63 | 143.42 | 38.66 | 143.45 | 38.82 | 12.069 | 189.1 | 7.5 |
| 12E | 143.53 | 38.63 | 143.50 | 38.47 | 143.38 | 38.50 | 143.42 | 38.66 | 12.264 | 190.8 | 7.3 |
| 13E | 143.50 | 38.47 | 143.45 | 38.31 | 143.34 | 38.35 | 143.38 | 38.50 | 12.445 | 192.6 | 7.4 |
| 14E | 143.45 | 38.31 | 143.42 | 38.16 | 143.30 | 38.19 | 143.34 | 38.35 | 12.468 | 189.8 | 7.5 |

|     |        |       |        |       |        |       |        |       |        |       |      |
|-----|--------|-------|--------|-------|--------|-------|--------|-------|--------|-------|------|
| 15E | 143.42 | 38.16 | 143.40 | 38.00 | 143.28 | 38.03 | 143.30 | 38.19 | 12.307 | 185.5 | 7.8  |
| 16E | 143.40 | 38.00 | 143.36 | 37.84 | 143.25 | 37.87 | 143.28 | 38.03 | 12.251 | 189.3 | 7.5  |
| 17E | 143.36 | 37.84 | 143.31 | 37.69 | 143.20 | 37.72 | 143.25 | 37.87 | 12.516 | 194.9 | 7.4  |
| 18E | 143.31 | 37.69 | 143.24 | 37.54 | 143.13 | 37.57 | 143.20 | 37.72 | 13.026 | 199.9 | 7.5  |
| 19E | 143.24 | 37.54 | 143.17 | 37.39 | 143.06 | 37.42 | 143.13 | 37.57 | 13.711 | 202.8 | 7.2  |
| 20E | 143.17 | 37.39 | 143.09 | 37.24 | 142.98 | 37.27 | 143.06 | 37.42 | 14.529 | 202.3 | 7.2  |
| 21E | 143.09 | 37.24 | 143.01 | 37.09 | 142.90 | 37.12 | 142.98 | 37.27 | 15.353 | 202.1 | 7.3  |
| 22E | 143.01 | 37.09 | 142.93 | 36.95 | 142.82 | 36.98 | 142.90 | 37.12 | 15.974 | 204.7 | 7.4  |
| 23E | 142.93 | 36.95 | 142.83 | 36.81 | 142.72 | 36.84 | 142.82 | 36.98 | 16.263 | 209.8 | 7.3  |
| 24E | 142.83 | 36.81 | 142.73 | 36.67 | 142.62 | 36.70 | 142.72 | 36.84 | 16.191 | 211.3 | 7.9  |
| 25E | 142.73 | 36.67 | 142.63 | 36.53 | 142.53 | 36.56 | 142.62 | 36.70 | 15.850 | 208.2 | 8.4  |
| 26E | 142.63 | 36.53 | 142.53 | 36.40 | 142.42 | 36.43 | 142.53 | 36.56 | 15.482 | 211.5 | 8.6  |
| 27E | 142.53 | 36.40 | 142.40 | 36.28 | 142.29 | 36.31 | 142.42 | 36.43 | 15.267 | 221.8 | 8.4  |
| 28E | 142.40 | 36.28 | 142.26 | 36.17 | 142.15 | 36.20 | 142.29 | 36.31 | 15.310 | 226.9 | 9.3  |
| 29E | 142.26 | 36.17 | 142.13 | 36.05 | 142.02 | 36.07 | 142.15 | 36.20 | 15.431 | 219.8 | 9.9  |
| 30E | 142.13 | 36.05 | 142.03 | 35.91 | 141.92 | 35.94 | 142.02 | 36.07 | 15.452 | 209.2 | 10.5 |
| 31E | 142.03 | 35.91 | 141.97 | 35.76 | 141.85 | 35.79 | 141.92 | 35.94 | 15.406 | 200.0 | 11.2 |
| 1F  | 143.74 | 40.39 | 143.69 | 40.23 | 143.51 | 40.28 | 143.56 | 40.43 | 15.382 | 194.5 | 10.1 |
| 2F  | 143.69 | 40.23 | 143.65 | 40.08 | 143.47 | 40.12 | 143.51 | 40.28 | 15.768 | 190.4 | 9.6  |
| 3F  | 143.65 | 40.08 | 143.63 | 39.92 | 143.45 | 39.96 | 143.47 | 40.12 | 15.949 | 186.1 | 9.7  |
| 4F  | 143.63 | 39.92 | 143.62 | 39.76 | 143.44 | 39.80 | 143.45 | 39.96 | 15.625 | 182.5 | 10.0 |
| 5F  | 143.62 | 39.76 | 143.62 | 39.60 | 143.44 | 39.64 | 143.44 | 39.80 | 14.898 | 180.7 | 9.7  |
| 6F  | 143.62 | 39.60 | 143.61 | 39.44 | 143.44 | 39.49 | 143.44 | 39.64 | 14.115 | 180.9 | 9.4  |
| 7F  | 143.61 | 39.44 | 143.60 | 39.28 | 143.42 | 39.33 | 143.44 | 39.49 | 13.532 | 184.6 | 8.9  |
| 8F  | 143.60 | 39.28 | 143.55 | 39.12 | 143.38 | 39.17 | 143.42 | 39.33 | 13.342 | 192.1 | 8.2  |
| 9F  | 143.55 | 39.12 | 143.50 | 38.97 | 143.32 | 39.02 | 143.38 | 39.17 | 13.553 | 196.0 | 8.6  |
| 10F | 143.50 | 38.97 | 143.45 | 38.82 | 143.28 | 38.86 | 143.32 | 39.02 | 13.856 | 192.4 | 9.2  |
| 11F | 143.45 | 38.82 | 143.42 | 38.66 | 143.25 | 38.70 | 143.28 | 38.86 | 14.047 | 188.9 | 9.2  |
| 12F | 143.42 | 38.66 | 143.38 | 38.50 | 143.21 | 38.55 | 143.25 | 38.70 | 14.206 | 190.8 | 9.2  |
| 13F | 143.38 | 38.50 | 143.34 | 38.35 | 143.16 | 38.39 | 143.21 | 38.55 | 14.388 | 192.6 | 8.7  |
| 14F | 143.34 | 38.35 | 143.30 | 38.19 | 143.13 | 38.23 | 143.16 | 38.39 | 14.449 | 189.2 | 9.1  |
| 15F | 143.30 | 38.19 | 143.28 | 38.03 | 143.11 | 38.07 | 143.13 | 38.23 | 14.296 | 185.9 | 9.1  |
| 16F | 143.28 | 38.03 | 143.25 | 37.87 | 143.08 | 37.92 | 143.11 | 38.07 | 14.220 | 188.7 | 9.1  |
| 17F | 143.25 | 37.87 | 143.20 | 37.72 | 143.03 | 37.76 | 143.08 | 37.92 | 14.430 | 194.9 | 9.0  |
| 18F | 143.20 | 37.72 | 143.13 | 37.57 | 142.96 | 37.61 | 143.03 | 37.76 | 14.910 | 199.8 | 8.4  |
| 19F | 143.13 | 37.57 | 143.06 | 37.42 | 142.88 | 37.46 | 142.96 | 37.61 | 15.619 | 202.6 | 8.7  |
| 20F | 143.06 | 37.42 | 142.98 | 37.27 | 142.80 | 37.32 | 142.88 | 37.46 | 16.438 | 202.5 | 8.9  |
| 21F | 142.98 | 37.27 | 142.90 | 37.12 | 142.73 | 37.17 | 142.80 | 37.32 | 17.230 | 201.8 | 8.6  |
| 22F | 142.90 | 37.12 | 142.82 | 36.98 | 142.65 | 37.02 | 142.73 | 37.17 | 17.846 | 205.0 | 8.4  |
| 23F | 142.82 | 36.98 | 142.72 | 36.84 | 142.55 | 36.89 | 142.65 | 37.02 | 18.185 | 210.2 | 8.6  |
| 24F | 142.72 | 36.84 | 142.62 | 36.70 | 142.45 | 36.75 | 142.55 | 36.89 | 18.205 | 210.3 | 8.8  |
| 25F | 142.62 | 36.70 | 142.53 | 36.56 | 142.36 | 36.61 | 142.45 | 36.75 | 17.902 | 207.7 | 9.4  |
| 26F | 142.53 | 36.56 | 142.42 | 36.43 | 142.26 | 36.47 | 142.36 | 36.61 | 17.522 | 212.2 | 9.2  |
| 27F | 142.42 | 36.43 | 142.29 | 36.31 | 142.12 | 36.35 | 142.26 | 36.47 | 17.436 | 222.8 | 9.3  |
| 28F | 142.29 | 36.31 | 142.15 | 36.20 | 141.98 | 36.24 | 142.12 | 36.35 | 17.637 | 225.3 | 10.4 |
| 29F | 142.15 | 36.20 | 142.02 | 36.07 | 141.86 | 36.11 | 141.98 | 36.24 | 17.875 | 218.7 | 10.8 |
| 30F | 142.02 | 36.07 | 141.92 | 35.94 | 141.76 | 35.98 | 141.86 | 36.11 | 18.042 | 210.1 | 11.9 |
| 31F | 141.92 | 35.94 | 141.85 | 35.79 | 141.69 | 35.83 | 141.76 | 35.98 | 18.035 | 200.6 | 12.1 |
| 1G  | 143.56 | 40.43 | 143.51 | 40.28 | 143.32 | 40.33 | 143.38 | 40.48 | 18.521 | 194.5 | 12.2 |
| 2G  | 143.51 | 40.28 | 143.47 | 40.12 | 143.29 | 40.17 | 143.32 | 40.33 | 18.872 | 190.4 | 11.9 |



|     |        |       |        |       |        |       |        |       |        |       |      |
|-----|--------|-------|--------|-------|--------|-------|--------|-------|--------|-------|------|
| 3G  | 143.47 | 40.12 | 143.45 | 39.96 | 143.26 | 40.01 | 143.29 | 40.17 | 19.126 | 186.0 | 11.9 |
| 4G  | 143.45 | 39.96 | 143.44 | 39.80 | 143.25 | 39.85 | 143.26 | 40.01 | 18.862 | 182.6 | 12.3 |
| 5G  | 143.44 | 39.80 | 143.44 | 39.64 | 143.25 | 39.69 | 143.25 | 39.85 | 18.051 | 180.7 | 12.6 |
| 6G  | 143.44 | 39.64 | 143.44 | 39.49 | 143.24 | 39.53 | 143.25 | 39.69 | 17.048 | 180.9 | 11.4 |
| 7G  | 143.44 | 39.49 | 143.42 | 39.33 | 143.23 | 39.38 | 143.24 | 39.53 | 16.309 | 184.7 | 10.2 |
| 8G  | 143.42 | 39.33 | 143.38 | 39.17 | 143.18 | 39.22 | 143.23 | 39.38 | 16.143 | 192.0 | 10.3 |
| 9G  | 143.38 | 39.17 | 143.32 | 39.02 | 143.13 | 39.07 | 143.18 | 39.22 | 16.496 | 195.8 | 10.6 |
| 10G | 143.32 | 39.02 | 143.28 | 38.86 | 143.08 | 38.91 | 143.13 | 39.07 | 16.923 | 192.3 | 11.2 |
| 11G | 143.28 | 38.86 | 143.25 | 38.70 | 143.05 | 38.75 | 143.08 | 38.91 | 17.115 | 188.8 | 11.6 |
| 12G | 143.25 | 38.70 | 143.21 | 38.55 | 143.01 | 38.60 | 143.05 | 38.75 | 17.180 | 190.8 | 11.1 |
| 13G | 143.21 | 38.55 | 143.16 | 38.39 | 142.97 | 38.44 | 143.01 | 38.60 | 17.306 | 192.6 | 10.8 |
| 14G | 143.16 | 38.39 | 143.13 | 38.23 | 142.93 | 38.28 | 142.97 | 38.44 | 17.393 | 189.2 | 10.4 |
| 15G | 143.13 | 38.23 | 143.11 | 38.07 | 142.91 | 38.13 | 142.93 | 38.28 | 17.276 | 186.0 | 10.6 |
| 16G | 143.11 | 38.07 | 143.08 | 37.92 | 142.88 | 37.97 | 142.91 | 38.13 | 17.198 | 188.7 | 10.5 |
| 17G | 143.08 | 37.92 | 143.03 | 37.76 | 142.83 | 37.81 | 142.88 | 37.97 | 17.393 | 194.9 | 10.3 |
| 18G | 143.03 | 37.76 | 142.96 | 37.61 | 142.76 | 37.66 | 142.83 | 37.81 | 17.889 | 199.6 | 10.8 |
| 19G | 142.96 | 37.61 | 142.88 | 37.46 | 142.68 | 37.52 | 142.76 | 37.66 | 18.634 | 202.4 | 10.7 |
| 20G | 142.88 | 37.46 | 142.80 | 37.32 | 142.61 | 37.37 | 142.68 | 37.52 | 19.424 | 202.3 | 10.8 |
| 21G | 142.80 | 37.32 | 142.73 | 37.17 | 142.54 | 37.22 | 142.61 | 37.37 | 20.105 | 201.4 | 10.5 |
| 22G | 142.73 | 37.17 | 142.65 | 37.02 | 142.46 | 37.07 | 142.54 | 37.22 | 20.637 | 204.5 | 10.1 |
| 23G | 142.65 | 37.02 | 142.55 | 36.89 | 142.36 | 36.94 | 142.46 | 37.07 | 20.977 | 209.7 | 9.9  |
| 24G | 142.55 | 36.89 | 142.45 | 36.75 | 142.27 | 36.80 | 142.36 | 36.94 | 21.060 | 209.8 | 10.3 |
| 25G | 142.45 | 36.75 | 142.36 | 36.61 | 142.18 | 36.65 | 142.27 | 36.80 | 20.780 | 207.2 | 10.5 |
| 26G | 142.36 | 36.61 | 142.26 | 36.47 | 142.08 | 36.52 | 142.18 | 36.65 | 20.389 | 211.8 | 10.7 |
| 27G | 142.26 | 36.47 | 142.12 | 36.35 | 141.95 | 36.40 | 142.08 | 36.52 | 20.399 | 222.2 | 10.9 |
| 28G | 142.12 | 36.35 | 141.98 | 36.24 | 141.81 | 36.28 | 141.95 | 36.40 | 20.787 | 224.8 | 11.4 |
| 29G | 141.98 | 36.24 | 141.86 | 36.11 | 141.69 | 36.16 | 141.81 | 36.28 | 21.253 | 218.1 | 12.8 |
| 30G | 141.86 | 36.11 | 141.76 | 35.98 | 141.60 | 36.02 | 141.69 | 36.16 | 21.606 | 210.1 | 13.7 |
| 31G | 141.76 | 35.98 | 141.69 | 35.83 | 141.52 | 35.87 | 141.60 | 36.02 | 21.636 | 200.7 | 14.4 |
| 1H  | 143.38 | 40.48 | 143.32 | 40.33 | 143.14 | 40.37 | 143.19 | 40.53 | 22.366 | 194.5 | 14.1 |
| 2H  | 143.32 | 40.33 | 143.29 | 40.17 | 143.10 | 40.22 | 143.14 | 40.37 | 22.725 | 190.6 | 14.1 |
| 3H  | 143.29 | 40.17 | 143.26 | 40.01 | 143.08 | 40.06 | 143.10 | 40.22 | 23.054 | 186.2 | 14.2 |
| 4H  | 143.26 | 40.01 | 143.25 | 39.85 | 143.06 | 39.90 | 143.08 | 40.06 | 22.864 | 182.9 | 14.2 |
| 5H  | 143.25 | 39.85 | 143.25 | 39.69 | 143.06 | 39.74 | 143.06 | 39.90 | 22.019 | 181.4 | 13.9 |
| 6H  | 143.25 | 39.69 | 143.24 | 39.53 | 143.05 | 39.58 | 143.06 | 39.74 | 20.833 | 181.2 | 14.1 |
| 7H  | 143.24 | 39.53 | 143.23 | 39.38 | 143.03 | 39.43 | 143.05 | 39.58 | 19.900 | 185.0 | 13.4 |
| 8H  | 143.23 | 39.38 | 143.18 | 39.22 | 142.98 | 39.27 | 143.03 | 39.43 | 19.716 | 192.1 | 12.2 |
| 9H  | 143.18 | 39.22 | 143.13 | 39.07 | 142.93 | 39.12 | 142.98 | 39.27 | 20.204 | 195.5 | 12.4 |
| 10H | 143.13 | 39.07 | 143.08 | 38.91 | 142.89 | 38.96 | 142.93 | 39.12 | 20.779 | 192.2 | 12.9 |
| 11H | 143.08 | 38.91 | 143.05 | 38.75 | 142.85 | 38.80 | 142.89 | 38.96 | 20.996 | 189.1 | 13.3 |
| 12H | 143.05 | 38.75 | 143.01 | 38.60 | 142.81 | 38.65 | 142.85 | 38.80 | 20.968 | 190.9 | 13.1 |
| 13H | 143.01 | 38.60 | 142.97 | 38.44 | 142.77 | 38.49 | 142.81 | 38.65 | 21.009 | 192.9 | 12.7 |
| 14H | 142.97 | 38.44 | 142.93 | 38.28 | 142.73 | 38.34 | 142.77 | 38.49 | 21.084 | 189.6 | 12.4 |
| 15H | 142.93 | 38.28 | 142.91 | 38.13 | 142.70 | 38.18 | 142.73 | 38.34 | 21.010 | 186.7 | 12.2 |
| 16H | 142.91 | 38.13 | 142.88 | 37.97 | 142.67 | 38.02 | 142.70 | 38.18 | 20.954 | 189.2 | 12.1 |
| 17H | 142.88 | 37.97 | 142.83 | 37.81 | 142.61 | 37.87 | 142.67 | 38.02 | 21.208 | 195.0 | 12.0 |
| 18H | 142.83 | 37.81 | 142.76 | 37.66 | 142.55 | 37.72 | 142.61 | 37.87 | 21.774 | 199.6 | 12.1 |
| 19H | 142.76 | 37.66 | 142.68 | 37.52 | 142.47 | 37.57 | 142.55 | 37.72 | 22.536 | 202.3 | 12.2 |
| 20H | 142.68 | 37.52 | 142.61 | 37.37 | 142.40 | 37.42 | 142.47 | 37.57 | 23.298 | 201.8 | 12.3 |
| 21H | 142.61 | 37.37 | 142.54 | 37.22 | 142.33 | 37.27 | 142.40 | 37.42 | 23.835 | 200.5 | 12.3 |

|     |        |       |        |       |        |       |        |       |        |       |      |
|-----|--------|-------|--------|-------|--------|-------|--------|-------|--------|-------|------|
| 22H | 142.54 | 37.22 | 142.46 | 37.07 | 142.26 | 37.13 | 142.33 | 37.27 | 24.172 | 203.3 | 11.8 |
| 23H | 142.46 | 37.07 | 142.36 | 36.94 | 142.17 | 36.99 | 142.26 | 37.13 | 24.441 | 208.6 | 11.5 |
| 24H | 142.36 | 36.94 | 142.27 | 36.80 | 142.08 | 36.85 | 142.17 | 36.99 | 24.561 | 208.6 | 11.9 |
| 25H | 142.27 | 36.80 | 142.18 | 36.65 | 142.00 | 36.70 | 142.08 | 36.85 | 24.295 | 206.2 | 12.4 |
| 26H | 142.18 | 36.65 | 142.08 | 36.52 | 141.90 | 36.56 | 142.00 | 36.70 | 23.871 | 210.7 | 12.7 |
| 27H | 142.08 | 36.52 | 141.95 | 36.40 | 141.78 | 36.44 | 141.90 | 36.56 | 23.856 | 221.0 | 12.5 |
| 28H | 141.95 | 36.40 | 141.81 | 36.28 | 141.65 | 36.32 | 141.78 | 36.44 | 24.386 | 223.6 | 12.8 |
| 29H | 141.81 | 36.28 | 141.69 | 36.16 | 141.53 | 36.20 | 141.65 | 36.32 | 25.079 | 217.3 | 14.1 |
| 30H | 141.69 | 36.16 | 141.60 | 36.02 | 141.43 | 36.06 | 141.53 | 36.20 | 25.595 | 210.0 | 14.7 |
| 31H | 141.60 | 36.02 | 141.52 | 35.87 | 141.36 | 35.91 | 141.43 | 36.06 | 25.707 | 201.3 | 15.1 |
| 1I  | 143.19 | 40.53 | 143.14 | 40.37 | 142.96 | 40.42 | 143.01 | 40.58 | 26.727 | 194.6 | 15.9 |
| 2I  | 143.14 | 40.37 | 143.10 | 40.22 | 142.92 | 40.27 | 142.96 | 40.42 | 27.075 | 191.0 | 15.5 |
| 3I  | 143.10 | 40.22 | 143.08 | 40.06 | 142.89 | 40.11 | 142.92 | 40.27 | 27.495 | 186.9 | 15.2 |
| 4I  | 143.08 | 40.06 | 143.06 | 39.90 | 142.87 | 39.95 | 142.89 | 40.11 | 27.460 | 183.5 | 15.9 |
| 5I  | 143.06 | 39.90 | 143.06 | 39.74 | 142.86 | 39.79 | 142.87 | 39.95 | 26.686 | 181.9 | 16.6 |
| 6I  | 143.06 | 39.74 | 143.05 | 39.58 | 142.85 | 39.63 | 142.86 | 39.79 | 25.423 | 182.0 | 16.1 |
| 7I  | 143.05 | 39.58 | 143.03 | 39.43 | 142.83 | 39.48 | 142.85 | 39.63 | 24.329 | 185.6 | 15.4 |
| 8I  | 143.03 | 39.43 | 142.98 | 39.27 | 142.79 | 39.32 | 142.83 | 39.48 | 24.103 | 192.3 | 15.0 |
| 9I  | 142.98 | 39.27 | 142.93 | 39.12 | 142.73 | 39.17 | 142.79 | 39.32 | 24.681 | 195.4 | 15.2 |
| 10I | 142.93 | 39.12 | 142.89 | 38.96 | 142.69 | 39.01 | 142.73 | 39.17 | 25.319 | 192.0 | 15.3 |
| 11I | 142.89 | 38.96 | 142.85 | 38.80 | 142.65 | 38.85 | 142.69 | 39.01 | 25.576 | 189.5 | 15.0 |
| 12I | 142.85 | 38.80 | 142.81 | 38.65 | 142.61 | 38.70 | 142.65 | 38.85 | 25.529 | 191.1 | 15.3 |
| 13I | 142.81 | 38.65 | 142.77 | 38.49 | 142.56 | 38.54 | 142.61 | 38.70 | 25.499 | 193.4 | 14.9 |
| 14I | 142.77 | 38.49 | 142.73 | 38.34 | 142.52 | 38.39 | 142.56 | 38.54 | 25.508 | 190.6 | 14.5 |
| 15I | 142.73 | 38.34 | 142.70 | 38.18 | 142.49 | 38.23 | 142.52 | 38.39 | 25.428 | 188.1 | 13.8 |
| 16I | 142.70 | 38.18 | 142.67 | 38.02 | 142.45 | 38.08 | 142.49 | 38.23 | 25.434 | 190.0 | 13.6 |
| 17I | 142.67 | 38.02 | 142.61 | 37.87 | 142.39 | 37.92 | 142.45 | 38.08 | 25.722 | 195.1 | 13.6 |
| 18I | 142.61 | 37.87 | 142.55 | 37.72 | 142.32 | 37.78 | 142.39 | 37.92 | 26.322 | 199.9 | 13.3 |
| 19I | 142.55 | 37.72 | 142.47 | 37.57 | 142.25 | 37.63 | 142.32 | 37.78 | 27.116 | 202.1 | 13.5 |
| 20I | 142.47 | 37.57 | 142.40 | 37.42 | 142.18 | 37.48 | 142.25 | 37.63 | 27.829 | 201.3 | 13.4 |
| 21I | 142.40 | 37.42 | 142.33 | 37.27 | 142.12 | 37.33 | 142.18 | 37.48 | 28.227 | 199.0 | 13.2 |
| 22I | 142.33 | 37.27 | 142.26 | 37.13 | 142.06 | 37.18 | 142.12 | 37.33 | 28.383 | 201.5 | 13.2 |
| 23I | 142.26 | 37.13 | 142.17 | 36.99 | 141.98 | 37.04 | 142.06 | 37.18 | 28.548 | 206.5 | 13.3 |
| 24I | 142.17 | 36.99 | 142.08 | 36.85 | 141.89 | 36.90 | 141.98 | 37.04 | 28.665 | 207.0 | 13.5 |
| 25I | 142.08 | 36.85 | 142.00 | 36.70 | 141.82 | 36.75 | 141.89 | 36.90 | 28.384 | 204.5 | 13.9 |
| 26I | 142.00 | 36.70 | 141.90 | 36.56 | 141.73 | 36.61 | 141.82 | 36.75 | 27.878 | 209.6 | 14.1 |
| 27I | 141.90 | 36.56 | 141.78 | 36.44 | 141.61 | 36.49 | 141.73 | 36.61 | 27.795 | 218.6 | 14.2 |
| 28I | 141.78 | 36.44 | 141.65 | 36.32 | 141.49 | 36.36 | 141.61 | 36.49 | 28.370 | 221.7 | 14.8 |
| 29I | 141.65 | 36.32 | 141.53 | 36.20 | 141.37 | 36.23 | 141.49 | 36.36 | 29.211 | 216.6 | 15.4 |
| 30I | 141.53 | 36.20 | 141.43 | 36.06 | 141.27 | 36.10 | 141.37 | 36.23 | 29.878 | 209.9 | 16.6 |
| 31I | 141.43 | 36.06 | 141.36 | 35.91 | 141.20 | 35.95 | 141.27 | 36.10 | 30.092 | 202.1 | 17.1 |
| 1J  | 143.01 | 40.58 | 142.96 | 40.42 | 142.78 | 40.47 | 142.83 | 40.62 | 31.517 | 194.8 | 17.6 |
| 2J  | 142.96 | 40.42 | 142.92 | 40.27 | 142.73 | 40.31 | 142.78 | 40.47 | 31.782 | 191.5 | 16.9 |
| 3J  | 142.92 | 40.27 | 142.89 | 40.11 | 142.70 | 40.16 | 142.73 | 40.31 | 32.279 | 187.5 | 16.6 |
| 4J  | 142.89 | 40.11 | 142.87 | 39.95 | 142.68 | 40.00 | 142.70 | 40.16 | 32.487 | 184.3 | 16.6 |
| 5J  | 142.87 | 39.95 | 142.86 | 39.79 | 142.67 | 39.84 | 142.68 | 40.00 | 31.948 | 182.7 | 17.2 |
| 6J  | 142.86 | 39.79 | 142.85 | 39.63 | 142.66 | 39.68 | 142.67 | 39.84 | 30.770 | 182.8 | 18.3 |
| 7J  | 142.85 | 39.63 | 142.83 | 39.48 | 142.63 | 39.52 | 142.66 | 39.68 | 29.631 | 186.6 | 18.3 |
| 8J  | 142.83 | 39.48 | 142.79 | 39.32 | 142.58 | 39.37 | 142.63 | 39.52 | 29.338 | 192.5 | 17.8 |
| 9J  | 142.79 | 39.32 | 142.73 | 39.17 | 142.53 | 39.22 | 142.58 | 39.37 | 29.887 | 195.3 | 16.8 |

|     |        |       |        |       |        |       |        |       |        |       |      |
|-----|--------|-------|--------|-------|--------|-------|--------|-------|--------|-------|------|
| 10J | 142.73 | 39.17 | 142.69 | 39.01 | 142.49 | 39.06 | 142.53 | 39.22 | 30.527 | 192.2 | 16.8 |
| 11J | 142.69 | 39.01 | 142.65 | 38.85 | 142.45 | 38.91 | 142.49 | 39.06 | 30.816 | 189.8 | 17.0 |
| 12J | 142.65 | 38.85 | 142.61 | 38.70 | 142.41 | 38.75 | 142.45 | 38.91 | 30.753 | 191.5 | 16.7 |
| 13J | 142.61 | 38.70 | 142.56 | 38.54 | 142.36 | 38.60 | 142.41 | 38.75 | 30.610 | 194.4 | 16.3 |
| 14J | 142.56 | 38.54 | 142.52 | 38.39 | 142.31 | 38.44 | 142.36 | 38.60 | 30.511 | 191.9 | 15.5 |
| 15J | 142.52 | 38.39 | 142.49 | 38.23 | 142.27 | 38.29 | 142.31 | 38.44 | 30.422 | 189.5 | 15.0 |
| 16J | 142.49 | 38.23 | 142.45 | 38.08 | 142.22 | 38.13 | 142.27 | 38.29 | 30.530 | 191.0 | 14.7 |
| 17J | 142.45 | 38.08 | 142.39 | 37.92 | 142.17 | 37.98 | 142.22 | 38.13 | 30.883 | 196.0 | 14.9 |
| 18J | 142.39 | 37.92 | 142.32 | 37.78 | 142.10 | 37.83 | 142.17 | 37.98 | 31.487 | 199.7 | 14.8 |
| 19J | 142.32 | 37.78 | 142.25 | 37.63 | 142.02 | 37.69 | 142.10 | 37.83 | 32.277 | 201.9 | 14.7 |
| 20J | 142.25 | 37.63 | 142.18 | 37.48 | 141.96 | 37.54 | 142.02 | 37.69 | 32.922 | 200.4 | 14.6 |
| 21J | 142.18 | 37.48 | 142.12 | 37.33 | 141.91 | 37.38 | 141.96 | 37.54 | 33.176 | 197.2 | 14.6 |
| 22J | 142.12 | 37.33 | 142.06 | 37.18 | 141.85 | 37.23 | 141.91 | 37.38 | 33.170 | 199.3 | 14.4 |
| 23J | 142.06 | 37.18 | 141.98 | 37.04 | 141.78 | 37.09 | 141.85 | 37.23 | 33.222 | 204.1 | 14.5 |
| 24J | 141.98 | 37.04 | 141.89 | 36.90 | 141.70 | 36.94 | 141.78 | 37.09 | 33.283 | 205.0 | 14.8 |
| 25J | 141.89 | 36.90 | 141.82 | 36.75 | 141.64 | 36.80 | 141.70 | 36.94 | 32.929 | 202.4 | 15.2 |
| 26J | 141.82 | 36.75 | 141.73 | 36.61 | 141.55 | 36.66 | 141.64 | 36.80 | 32.328 | 208.1 | 15.4 |
| 27J | 141.73 | 36.61 | 141.61 | 36.49 | 141.44 | 36.53 | 141.55 | 36.66 | 32.204 | 216.4 | 15.9 |
| 28J | 141.61 | 36.49 | 141.49 | 36.36 | 141.33 | 36.40 | 141.44 | 36.53 | 32.814 | 219.0 | 16.6 |
| 29J | 141.49 | 36.36 | 141.37 | 36.23 | 141.22 | 36.27 | 141.33 | 36.40 | 33.772 | 215.2 | 17.6 |
| 30J | 141.37 | 36.23 | 141.27 | 36.10 | 141.12 | 36.13 | 141.22 | 36.27 | 34.566 | 209.9 | 18.4 |
| 31J | 141.27 | 36.10 | 141.20 | 35.95 | 141.04 | 35.99 | 141.12 | 36.13 | 34.844 | 203.2 | 18.6 |
| 1K  | 142.83 | 40.62 | 142.78 | 40.47 | 142.60 | 40.51 | 142.65 | 40.67 | 36.804 | 195.2 | 19.8 |
| 2K  | 142.78 | 40.47 | 142.73 | 40.31 | 142.55 | 40.36 | 142.60 | 40.51 | 36.932 | 192.0 | 18.6 |
| 3K  | 142.73 | 40.31 | 142.70 | 40.16 | 142.51 | 40.20 | 142.55 | 40.36 | 37.431 | 188.7 | 18.0 |
| 4K  | 142.70 | 40.16 | 142.68 | 40.00 | 142.49 | 40.04 | 142.51 | 40.20 | 37.796 | 185.0 | 17.7 |
| 5K  | 142.68 | 40.00 | 142.67 | 39.84 | 142.48 | 39.89 | 142.49 | 40.04 | 37.580 | 183.4 | 18.4 |
| 6K  | 142.67 | 39.84 | 142.66 | 39.68 | 142.46 | 39.73 | 142.48 | 39.89 | 36.659 | 183.8 | 18.9 |
| 7K  | 142.66 | 39.68 | 142.63 | 39.52 | 142.43 | 39.57 | 142.46 | 39.73 | 35.572 | 186.8 | 19.3 |
| 8K  | 142.63 | 39.52 | 142.58 | 39.37 | 142.38 | 39.42 | 142.43 | 39.57 | 35.205 | 193.7 | 18.9 |
| 9K  | 142.58 | 39.37 | 142.53 | 39.22 | 142.33 | 39.27 | 142.38 | 39.42 | 35.645 | 195.0 | 18.7 |
| 10K | 142.53 | 39.22 | 142.49 | 39.06 | 142.29 | 39.11 | 142.33 | 39.27 | 36.262 | 192.4 | 18.0 |
| 11K | 142.49 | 39.06 | 142.45 | 38.91 | 142.25 | 38.96 | 142.29 | 39.11 | 36.625 | 190.5 | 18.2 |
| 12K | 142.45 | 38.91 | 142.41 | 38.75 | 142.20 | 38.80 | 142.25 | 38.96 | 36.555 | 191.8 | 18.5 |
| 13K | 142.41 | 38.75 | 142.36 | 38.60 | 142.15 | 38.65 | 142.20 | 38.80 | 36.316 | 195.0 | 18.1 |
| 14K | 142.36 | 38.60 | 142.31 | 38.44 | 142.09 | 38.50 | 142.15 | 38.65 | 36.098 | 193.8 | 17.7 |
| 15K | 142.31 | 38.44 | 142.27 | 38.29 | 142.05 | 38.34 | 142.09 | 38.50 | 35.941 | 191.6 | 16.7 |
| 16K | 142.27 | 38.29 | 142.22 | 38.13 | 142.00 | 38.19 | 142.05 | 38.34 | 36.063 | 192.1 | 15.9 |
| 17K | 142.22 | 38.13 | 142.17 | 37.98 | 141.94 | 38.04 | 142.00 | 38.19 | 36.476 | 196.5 | 15.2 |
| 18K | 142.17 | 37.98 | 142.10 | 37.83 | 141.87 | 37.89 | 141.94 | 38.04 | 37.131 | 200.0 | 15.5 |
| 19K | 142.10 | 37.83 | 142.02 | 37.69 | 141.80 | 37.74 | 141.87 | 37.89 | 37.903 | 201.8 | 15.5 |
| 20K | 142.02 | 37.69 | 141.96 | 37.54 | 141.73 | 37.59 | 141.80 | 37.74 | 38.506 | 199.6 | 15.3 |
| 21K | 141.96 | 37.54 | 141.91 | 37.38 | 141.69 | 37.44 | 141.73 | 37.59 | 38.624 | 195.0 | 15.5 |
| 22K | 141.91 | 37.38 | 141.85 | 37.23 | 141.64 | 37.29 | 141.69 | 37.44 | 38.406 | 196.2 | 15.4 |
| 23K | 141.85 | 37.23 | 141.78 | 37.09 | 141.58 | 37.14 | 141.64 | 37.29 | 38.353 | 202.0 | 15.5 |
| 24K | 141.78 | 37.09 | 141.70 | 36.94 | 141.51 | 37.00 | 141.58 | 37.14 | 38.373 | 202.6 | 16.2 |
| 25K | 141.70 | 36.94 | 141.64 | 36.80 | 141.45 | 36.85 | 141.51 | 37.00 | 37.964 | 199.8 | 16.7 |
| 26K | 141.64 | 36.80 | 141.55 | 36.66 | 141.38 | 36.70 | 141.45 | 36.85 | 37.337 | 205.3 | 17.3 |
| 27K | 141.55 | 36.66 | 141.44 | 36.53 | 141.28 | 36.57 | 141.38 | 36.70 | 37.169 | 213.5 | 18.1 |
| 28K | 141.44 | 36.53 | 141.33 | 36.40 | 141.17 | 36.44 | 141.28 | 36.57 | 37.792 | 217.6 | 18.7 |

|     |        |       |        |       |        |       |        |       |        |       |      |
|-----|--------|-------|--------|-------|--------|-------|--------|-------|--------|-------|------|
| 29K | 141.33 | 36.40 | 141.22 | 36.27 | 141.06 | 36.31 | 141.17 | 36.44 | 38.784 | 213.6 | 19.9 |
| 30K | 141.22 | 36.27 | 141.12 | 36.13 | 140.97 | 36.17 | 141.06 | 36.31 | 39.587 | 209.9 | 19.8 |
| 31K | 141.12 | 36.13 | 141.04 | 35.99 | 140.88 | 36.03 | 140.97 | 36.17 | 39.888 | 204.3 | 19.8 |
| 1L  | 142.67 | 40.72 | 142.58 | 40.46 | 142.28 | 40.54 | 142.37 | 40.79 | 44.874 | 194.9 | 21.8 |
| 2L  | 142.58 | 40.46 | 142.51 | 40.20 | 142.21 | 40.28 | 142.28 | 40.54 | 44.988 | 190.5 | 20.9 |
| 3L  | 142.51 | 40.20 | 142.49 | 39.94 | 142.17 | 40.02 | 142.21 | 40.28 | 45.448 | 184.7 | 20.1 |
| 4L  | 142.49 | 39.94 | 142.46 | 39.68 | 142.13 | 39.76 | 142.17 | 40.02 | 44.812 | 185.1 | 19.7 |
| 5L  | 142.46 | 39.68 | 142.38 | 39.42 | 142.05 | 39.50 | 142.13 | 39.76 | 43.965 | 192.1 | 20.3 |
| 6L  | 142.38 | 39.42 | 142.30 | 39.16 | 141.97 | 39.24 | 142.05 | 39.50 | 44.265 | 194.3 | 20.1 |
| 7L  | 142.30 | 39.16 | 142.23 | 38.90 | 141.90 | 38.99 | 141.97 | 39.24 | 44.930 | 191.3 | 19.3 |
| 8L  | 142.23 | 38.90 | 142.15 | 38.65 | 141.80 | 38.73 | 141.90 | 38.99 | 44.920 | 194.8 | 19.5 |
| 9L  | 142.15 | 38.65 | 142.06 | 38.40 | 141.70 | 38.48 | 141.80 | 38.73 | 44.416 | 194.9 | 19.2 |
| 10L | 142.06 | 38.40 | 141.98 | 38.14 | 141.61 | 38.23 | 141.70 | 38.48 | 44.273 | 193.6 | 17.7 |
| 11L | 141.98 | 38.14 | 141.87 | 37.89 | 141.49 | 37.98 | 141.61 | 38.23 | 45.026 | 199.3 | 16.8 |
| 12L | 141.87 | 37.89 | 141.75 | 37.64 | 141.38 | 37.74 | 141.49 | 37.98 | 46.136 | 200.9 | 16.7 |
| 13L | 141.75 | 37.64 | 141.68 | 37.39 | 141.32 | 37.48 | 141.38 | 37.74 | 46.417 | 193.3 | 16.6 |
| 14L | 141.68 | 37.39 | 141.58 | 37.14 | 141.25 | 37.23 | 141.32 | 37.48 | 46.036 | 197.1 | 17.1 |
| 15L | 141.58 | 37.14 | 141.47 | 36.90 | 141.17 | 36.97 | 141.25 | 37.23 | 45.687 | 199.0 | 17.3 |
| 16L | 141.47 | 36.90 | 141.34 | 36.66 | 141.06 | 36.73 | 141.17 | 36.97 | 45.125 | 203.4 | 19.0 |
| 17L | 141.34 | 36.66 | 141.17 | 36.44 | 140.91 | 36.50 | 141.06 | 36.73 | 45.219 | 212.9 | 20.6 |
| 18L | 141.17 | 36.44 | 141.00 | 36.22 | 140.74 | 36.28 | 140.91 | 36.50 | 46.350 | 211.6 | 21.5 |
| 19L | 141.00 | 36.22 | 140.86 | 35.98 | 140.59 | 36.04 | 140.74 | 36.28 | 47.015 | 205.9 | 21.3 |
| 1M  | 142.37 | 40.79 | 142.28 | 40.54 | 141.99 | 40.61 | 142.08 | 40.86 | 55.360 | 195.1 | 21.6 |
| 2M  | 142.28 | 40.54 | 142.21 | 40.28 | 141.90 | 40.35 | 141.99 | 40.61 | 55.441 | 192.4 | 22.9 |
| 3M  | 142.21 | 40.28 | 142.17 | 40.02 | 141.86 | 40.09 | 141.90 | 40.35 | 55.900 | 186.1 | 21.5 |
| 4M  | 142.17 | 40.02 | 142.13 | 39.76 | 141.81 | 39.83 | 141.86 | 40.09 | 55.614 | 186.8 | 21.5 |
| 5M  | 142.13 | 39.76 | 142.05 | 39.50 | 141.73 | 39.58 | 141.81 | 39.83 | 55.068 | 192.9 | 21.7 |
| 6M  | 142.05 | 39.50 | 141.97 | 39.24 | 141.64 | 39.32 | 141.73 | 39.58 | 55.240 | 194.7 | 21.5 |
| 7M  | 141.97 | 39.24 | 141.90 | 38.99 | 141.57 | 39.07 | 141.64 | 39.32 | 55.826 | 192.0 | 20.7 |
| 8M  | 141.90 | 38.99 | 141.80 | 38.73 | 141.47 | 38.81 | 141.57 | 39.07 | 55.957 | 195.8 | 20.6 |
| 9M  | 141.80 | 38.73 | 141.70 | 38.48 | 141.35 | 38.57 | 141.47 | 38.81 | 55.434 | 198.3 | 20.5 |
| 10M | 141.70 | 38.48 | 141.61 | 38.23 | 141.25 | 38.32 | 141.35 | 38.57 | 55.116 | 195.9 | 19.7 |
| 11M | 141.61 | 38.23 | 141.49 | 37.98 | 141.13 | 38.07 | 141.25 | 38.32 | 55.687 | 199.8 | 18.6 |
| 12M | 141.49 | 37.98 | 141.38 | 37.74 | 141.02 | 37.83 | 141.13 | 38.07 | 56.706 | 200.3 | 17.9 |
| 13M | 141.38 | 37.74 | 141.32 | 37.48 | 140.98 | 37.57 | 141.02 | 37.83 | 56.850 | 189.3 | 18.1 |
| 14M | 141.32 | 37.48 | 141.25 | 37.23 | 140.93 | 37.31 | 140.98 | 37.57 | 56.219 | 192.7 | 18.6 |
| 15M | 141.25 | 37.23 | 141.17 | 36.97 | 140.87 | 37.05 | 140.93 | 37.31 | 55.821 | 195.0 | 19.7 |
| 16M | 141.17 | 36.97 | 141.06 | 36.73 | 140.79 | 36.80 | 140.87 | 37.05 | 55.341 | 198.6 | 20.9 |
| 17M | 141.06 | 36.73 | 140.91 | 36.50 | 140.65 | 36.56 | 140.79 | 36.80 | 55.316 | 207.9 | 22.1 |
| 18M | 140.91 | 36.50 | 140.74 | 36.28 | 140.49 | 36.33 | 140.65 | 36.56 | 56.238 | 210.8 | 23.6 |
| 19M | 140.74 | 36.28 | 140.59 | 36.04 | 140.33 | 36.11 | 140.49 | 36.33 | 56.786 | 208.2 | 23.7 |
| 1N  | 142.08 | 40.86 | 141.99 | 40.61 | 141.70 | 40.68 | 141.78 | 40.93 | 66.313 | 194.7 | 23.3 |
| 2N  | 141.99 | 40.61 | 141.90 | 40.35 | 141.60 | 40.43 | 141.70 | 40.68 | 66.459 | 194.2 | 23.6 |
| 3N  | 141.90 | 40.35 | 141.86 | 40.09 | 141.55 | 40.17 | 141.60 | 40.43 | 66.801 | 187.4 | 22.7 |
| 4N  | 141.86 | 40.09 | 141.81 | 39.83 | 141.51 | 39.91 | 141.55 | 40.17 | 66.750 | 187.7 | 21.9 |
| 5N  | 141.81 | 39.83 | 141.73 | 39.58 | 141.42 | 39.65 | 141.51 | 39.91 | 66.466 | 194.0 | 22.6 |
| 6N  | 141.73 | 39.58 | 141.64 | 39.32 | 141.33 | 39.40 | 141.42 | 39.65 | 66.504 | 195.0 | 22.3 |
| 7N  | 141.64 | 39.32 | 141.57 | 39.07 | 141.25 | 39.14 | 141.33 | 39.40 | 66.863 | 192.6 | 21.6 |
| 8N  | 141.57 | 39.07 | 141.47 | 38.81 | 141.15 | 38.89 | 141.25 | 39.14 | 67.044 | 196.6 | 20.7 |
| 9N  | 141.47 | 38.81 | 141.35 | 38.57 | 141.03 | 38.65 | 141.15 | 38.89 | 66.754 | 201.0 | 21.1 |

|     |        |       |        |       |        |       |        |       |        |       |      |
|-----|--------|-------|--------|-------|--------|-------|--------|-------|--------|-------|------|
| 10N | 141.35 | 38.57 | 141.25 | 38.32 | 140.91 | 38.40 | 141.03 | 38.65 | 66.441 | 198.1 | 21.5 |
| 11N | 141.25 | 38.32 | 141.13 | 38.07 | 140.79 | 38.15 | 140.91 | 38.40 | 66.691 | 200.5 | 20.6 |
| 12N | 141.13 | 38.07 | 141.02 | 37.83 | 140.68 | 37.91 | 140.79 | 38.15 | 67.415 | 199.6 | 19.5 |
| 13N | 141.02 | 37.83 | 140.98 | 37.57 | 140.66 | 37.64 | 140.68 | 37.91 | 67.523 | 186.0 | 18.8 |
| 14N | 140.98 | 37.57 | 140.93 | 37.31 | 140.63 | 37.38 | 140.66 | 37.64 | 67.018 | 188.3 | 20.3 |
| 15N | 140.93 | 37.31 | 140.87 | 37.05 | 140.58 | 37.12 | 140.63 | 37.38 | 66.635 | 191.3 | 21.8 |
| 16N | 140.87 | 37.05 | 140.79 | 36.80 | 140.51 | 36.87 | 140.58 | 37.12 | 66.187 | 195.0 | 22.5 |
| 17N | 140.79 | 36.80 | 140.65 | 36.56 | 140.39 | 36.62 | 140.51 | 36.87 | 66.119 | 204.0 | 23.9 |
| 18N | 140.65 | 36.56 | 140.49 | 36.33 | 140.23 | 36.39 | 140.39 | 36.62 | 66.758 | 209.8 | 24.1 |
| 19N | 140.49 | 36.33 | 140.33 | 36.11 | 140.06 | 36.17 | 140.23 | 36.39 | 67.104 | 210.4 | 23.2 |

**Supplementary Table S3 - Slip distribution and errors.**

| Subf.<br># | Average Model |             | Best Model  |             |
|------------|---------------|-------------|-------------|-------------|
|            | Slip<br>(m)   | Rake<br>(°) | Slip<br>(m) | Rake<br>(°) |
| 1A         | 7.2 ± 4.5     | 85.0 ± 9.4  | 5           | 80          |
| 2A         | 5.6 ± 3.8     | 85.0 ± 9.4  | 0           | 80          |
| 3A         | 4.8 ± 3.7     | 85.0 ± 9.4  | 2           | 80          |
| 4A         | 5.0 ± 3.7     | 75.3 ± 1.1  | 4           | 75          |
| 5A         | 9.0 ± 5.3     | 75.3 ± 1.1  | 1           | 75          |
| 6A         | 12.8 ± 5.1    | 75.3 ± 1.1  | 7           | 75          |
| 7A         | 22.4 ± 6.9    | 75.3 ± 1.1  | 29          | 75          |
| 8A         | 21.3 ± 7.2    | 75.3 ± 1.1  | 30          | 75          |
| 9A         | 17.8 ± 6.0    | 75.1 ± 0.6  | 17          | 75          |
| 10A        | 23.8 ± 6.0    | 75.1 ± 0.6  | 27          | 75          |
| 11A        | 25.4 ± 6.7    | 75.1 ± 0.6  | 24          | 75          |
| 12A        | 12.7 ± 5.8    | 75.1 ± 0.6  | 14          | 75          |
| 13A        | 10.8 ± 5.9    | 75.1 ± 0.6  | 10          | 75          |
| 14A        | 18.5 ± 7.7    | 105.0 ± 2.8 | 15          | 105         |
| 15A        | 23.6 ± 7.5    | 105.0 ± 2.8 | 23          | 105         |
| 16A        | 21.4 ± 7.9    | 105.0 ± 2.8 | 29          | 105         |
| 17A        | 20.9 ± 8.1    | 105.0 ± 2.8 | 25          | 105         |
| 18A        | 18.6 ± 6.7    | 105.0 ± 2.8 | 21          | 105         |
| 19A        | 18.7 ± 7.2    | 106.3 ± 3.9 | 19          | 100         |
| 20A        | 15.9 ± 7.9    | 106.3 ± 3.9 | 11          | 100         |
| 21A        | 11.1 ± 7.0    | 106.3 ± 3.9 | 12          | 100         |
| 22A        | 12.6 ± 6.4    | 106.3 ± 3.9 | 17          | 100         |
| 23A        | 15.3 ± 8.4    | 106.3 ± 3.9 | 9           | 100         |
| 24A        | 11.5 ± 6.0    | 93.1 ± 12.2 | 9           | 110         |
| 25A        | 8.2 ± 5.1     | 93.1 ± 12.2 | 9           | 110         |
| 26A        | 5.4 ± 4.6     | 93.1 ± 12.2 | 14          | 110         |
| 27A        | 6.0 ± 5.2     | 93.1 ± 12.2 | 9           | 110         |
| 28A        | 6.3 ± 5.1     | 93.1 ± 12.2 | 4           | 110         |
| 29A        | 4.1 ± 3.2     | 87.8 ± 9.3  | 0           | 90          |
| 30A        | 5.6 ± 4.6     | 87.8 ± 9.3  | 1           | 90          |
| 31A        | 5.1 ± 3.9     | 87.8 ± 9.3  | 0           | 90          |
| 1B         | 7.5 ± 4.4     | 85.0 ± 9.4  | 13          | 80          |
| 2B         | 6.9 ± 4.1     | 85.0 ± 9.4  | 5           | 80          |
| 3B         | 6.8 ± 3.8     | 85.0 ± 9.4  | 2           | 80          |
| 4B         | 9.2 ± 5.4     | 75.3 ± 1.1  | 8           | 75          |
| 5B         | 11.3 ± 4.5    | 75.3 ± 1.1  | 14          | 75          |
| 6B         | 9.6 ± 4.4     | 75.3 ± 1.1  | 6           | 75          |
| 7B         | 21.3 ± 4.8    | 75.3 ± 1.1  | 25          | 75          |
| 8B         | 21.8 ± 5.2    | 75.3 ± 1.1  | 27          | 75          |
| 9B         | 25.9 ± 6.0    | 75.1 ± 0.6  | 22          | 75          |
| 10B        | 22.1 ± 6.8    | 75.1 ± 0.6  | 25          | 75          |
| 11B        | 23.0 ± 4.7    | 75.1 ± 0.6  | 23          | 75          |
| 12B        | 21.8 ± 5.5    | 75.1 ± 0.6  | 19          | 75          |
| 13B        | 26.1 ± 6.3    | 75.1 ± 0.6  | 29          | 75          |
| 14B        | 28.0 ± 6.1    | 105.0 ± 2.8 | 29          | 105         |
| 15B        | 36.5 ± 7.1    | 105.0 ± 2.8 | 44          | 105         |
| 16B        | 34.2 ± 7.9    | 105.0 ± 2.8 | 36          | 105         |
| 17B        | 30.8 ± 8.6    | 105.0 ± 2.8 | 36          | 105         |
| 18B        | 26.5 ± 7.4    | 105.0 ± 2.8 | 28          | 105         |
| 19B        | 23.2 ± 7.4    | 106.3 ± 3.9 | 18          | 100         |
| 20B        | 20.4 ± 7.4    | 106.3 ± 3.9 | 22          | 100         |

|     |            |             |    |     |
|-----|------------|-------------|----|-----|
| 21B | 15.0 ± 7.5 | 106.3 ± 3.9 | 12 | 100 |
| 22B | 14.4 ± 7.4 | 106.3 ± 3.9 | 20 | 100 |
| 23B | 10.6 ± 6.1 | 106.3 ± 3.9 | 11 | 100 |
| 24B | 7.2 ± 5.4  | 93.1 ± 12.2 | 12 | 110 |
| 25B | 8.5 ± 5.7  | 93.1 ± 12.2 | 5  | 110 |
| 26B | 6.1 ± 4.8  | 93.1 ± 12.2 | 18 | 110 |
| 27B | 6.7 ± 5.0  | 93.1 ± 12.2 | 7  | 110 |
| 28B | 7.5 ± 5.3  | 93.1 ± 12.2 | 12 | 110 |
| 29B | 5.7 ± 4.5  | 87.8 ± 9.3  | 9  | 90  |
| 30B | 5.1 ± 3.8  | 87.8 ± 9.3  | 5  | 90  |
| 31B | 4.6 ± 4.0  | 87.8 ± 9.3  | 8  | 90  |
| 1C  | 6.2 ± 4.1  | 85.0 ± 9.4  | 0  | 80  |
| 2C  | 4.4 ± 3.8  | 85.0 ± 9.4  | 1  | 80  |
| 3C  | 3.2 ± 2.4  | 85.0 ± 9.4  | 1  | 80  |
| 4C  | 11.0 ± 5.8 | 75.3 ± 1.1  | 15 | 75  |
| 5C  | 8.3 ± 4.6  | 75.3 ± 1.1  | 12 | 75  |
| 6C  | 9.6 ± 4.5  | 75.3 ± 1.1  | 12 | 75  |
| 7C  | 8.4 ± 4.9  | 75.3 ± 1.1  | 6  | 75  |
| 8C  | 8.9 ± 4.1  | 75.3 ± 1.1  | 15 | 75  |
| 9C  | 18.5 ± 6.4 | 75.1 ± 0.6  | 17 | 75  |
| 10C | 17.9 ± 5.5 | 75.1 ± 0.6  | 16 | 75  |
| 11C | 17.2 ± 4.9 | 75.1 ± 0.6  | 23 | 75  |
| 12C | 19.5 ± 5.0 | 75.1 ± 0.6  | 20 | 75  |
| 13C | 28.3 ± 5.0 | 75.1 ± 0.6  | 29 | 75  |
| 14C | 27.7 ± 4.5 | 105.0 ± 2.8 | 25 | 105 |
| 15C | 31.8 ± 5.8 | 105.0 ± 2.8 | 29 | 105 |
| 16C | 35.8 ± 6.3 | 105.0 ± 2.8 | 42 | 105 |
| 17C | 24.3 ± 6.5 | 105.0 ± 2.8 | 24 | 105 |
| 18C | 17.1 ± 6.9 | 105.0 ± 2.8 | 27 | 105 |
| 19C | 15.9 ± 6.8 | 106.3 ± 3.9 | 16 | 100 |
| 20C | 21.9 ± 7.2 | 106.3 ± 3.9 | 27 | 100 |
| 21C | 21.7 ± 7.2 | 106.3 ± 3.9 | 23 | 100 |
| 22C | 15.1 ± 6.4 | 106.3 ± 3.9 | 3  | 100 |
| 23C | 8.6 ± 6.7  | 106.3 ± 3.9 | 5  | 100 |
| 24C | 6.9 ± 5.3  | 93.1 ± 12.2 | 6  | 110 |
| 25C | 9.0 ± 5.8  | 93.1 ± 12.2 | 3  | 110 |
| 26C | 7.1 ± 5.3  | 93.1 ± 12.2 | 13 | 110 |
| 27C | 6.1 ± 4.8  | 93.1 ± 12.2 | 19 | 110 |
| 28C | 8.1 ± 5.1  | 93.1 ± 12.2 | 10 | 110 |
| 29C | 7.3 ± 4.6  | 87.8 ± 9.3  | 6  | 90  |
| 30C | 5.1 ± 4.2  | 87.8 ± 9.3  | 1  | 90  |
| 31C | 4.5 ± 4.1  | 87.8 ± 9.3  | 2  | 90  |
| 1D  | 2.9 ± 2.3  | 85.0 ± 9.4  | 7  | 80  |
| 2D  | 1.7 ± 2.1  | 85.0 ± 9.4  | 0  | 80  |
| 3D  | 2.9 ± 2.4  | 85.0 ± 9.4  | 4  | 80  |
| 4D  | 4.8 ± 3.3  | 75.3 ± 1.1  | 0  | 75  |
| 5D  | 2.9 ± 2.7  | 75.3 ± 1.1  | 2  | 75  |
| 6D  | 3.1 ± 2.5  | 75.3 ± 1.1  | 3  | 75  |
| 7D  | 3.4 ± 2.7  | 75.3 ± 1.1  | 4  | 75  |
| 8D  | 7.7 ± 4.7  | 75.3 ± 1.1  | 5  | 75  |
| 9D  | 12.5 ± 5.0 | 75.1 ± 0.6  | 18 | 75  |
| 10D | 12.6 ± 4.1 | 75.1 ± 0.6  | 11 | 75  |
| 11D | 8.5 ± 4.4  | 75.1 ± 0.6  | 21 | 75  |
| 12D | 18.7 ± 4.8 | 75.1 ± 0.6  | 8  | 75  |
| 13D | 35.8 ± 4.2 | 75.1 ± 0.6  | 33 | 75  |
| 14D | 26.7 ± 4.8 | 105.0 ± 2.8 | 27 | 105 |
| 15D | 31.5 ± 5.9 | 105.0 ± 2.8 | 29 | 105 |
| 16D | 44.7 ± 6.3 | 105.0 ± 2.8 | 45 | 105 |
| 17D | 38.6 ± 6.9 | 105.0 ± 2.8 | 33 | 105 |

|     |            |             |    |     |
|-----|------------|-------------|----|-----|
| 18D | 24.9 ± 6.1 | 105.0 ± 2.8 | 27 | 105 |
| 19D | 13.6 ± 7.0 | 106.3 ± 3.9 | 13 | 100 |
| 20D | 12.8 ± 6.4 | 106.3 ± 3.9 | 7  | 100 |
| 21D | 17.3 ± 5.7 | 106.3 ± 3.9 | 14 | 100 |
| 22D | 11.5 ± 5.9 | 106.3 ± 3.9 | 12 | 100 |
| 23D | 7.1 ± 5.3  | 106.3 ± 3.9 | 2  | 100 |
| 24D | 5.7 ± 5.1  | 93.1 ± 12.2 | 1  | 110 |
| 25D | 5.5 ± 4.3  | 93.1 ± 12.2 | 5  | 110 |
| 26D | 3.9 ± 3.6  | 93.1 ± 12.2 | 2  | 110 |
| 27D | 3.9 ± 3.7  | 93.1 ± 12.2 | 13 | 110 |
| 28D | 5.5 ± 3.9  | 93.1 ± 12.2 | 6  | 110 |
| 29D | 4.3 ± 4.0  | 87.8 ± 9.3  | 1  | 90  |
| 30D | 5.5 ± 4.5  | 87.8 ± 9.3  | 8  | 90  |
| 31D | 6.0 ± 4.2  | 87.8 ± 9.3  | 4  | 90  |
| 1E  | 2.4 ± 2.6  | 85.0 ± 9.4  | 2  | 80  |
| 2E  | 3.8 ± 3.3  | 85.0 ± 9.4  | 0  | 80  |
| 3E  | 6.2 ± 3.5  | 85.0 ± 9.4  | 4  | 80  |
| 4E  | 3.5 ± 3.2  | 75.3 ± 1.1  | 4  | 75  |
| 5E  | 3.9 ± 3.2  | 75.3 ± 1.1  | 2  | 75  |
| 6E  | 4.9 ± 3.5  | 75.3 ± 1.1  | 0  | 75  |
| 7E  | 4.1 ± 3.3  | 75.3 ± 1.1  | 4  | 75  |
| 8E  | 12.3 ± 4.7 | 75.3 ± 1.1  | 17 | 75  |
| 9E  | 12.8 ± 5.0 | 75.1 ± 0.6  | 16 | 75  |
| 10E | 12.6 ± 3.5 | 75.1 ± 0.6  | 8  | 75  |
| 11E | 8.8 ± 4.2  | 75.1 ± 0.6  | 16 | 75  |
| 12E | 24.0 ± 4.3 | 75.1 ± 0.6  | 23 | 75  |
| 13E | 31.4 ± 5.1 | 75.1 ± 0.6  | 42 | 75  |
| 14E | 11.6 ± 3.6 | 105.0 ± 2.8 | 10 | 105 |
| 15E | 18.9 ± 5.4 | 105.0 ± 2.8 | 17 | 105 |
| 16E | 32.9 ± 5.9 | 105.0 ± 2.8 | 32 | 105 |
| 17E | 31.5 ± 5.9 | 105.0 ± 2.8 | 31 | 105 |
| 18E | 29.4 ± 6.5 | 105.0 ± 2.8 | 32 | 105 |
| 19E | 19.6 ± 7.4 | 106.3 ± 3.9 | 25 | 100 |
| 20E | 11.2 ± 5.3 | 106.3 ± 3.9 | 13 | 100 |
| 21E | 10.8 ± 5.1 | 106.3 ± 3.9 | 12 | 100 |
| 22E | 9.4 ± 5.7  | 106.3 ± 3.9 | 3  | 100 |
| 23E | 6.5 ± 4.5  | 106.3 ± 3.9 | 4  | 100 |
| 24E | 4.4 ± 3.5  | 93.1 ± 12.2 | 9  | 110 |
| 25E | 4.0 ± 3.7  | 93.1 ± 12.2 | 2  | 110 |
| 26E | 3.8 ± 3.2  | 93.1 ± 12.2 | 1  | 110 |
| 27E | 3.1 ± 2.8  | 93.1 ± 12.2 | 3  | 110 |
| 28E | 4.5 ± 3.6  | 93.1 ± 12.2 | 1  | 110 |
| 29E | 5.3 ± 4.0  | 87.8 ± 9.3  | 6  | 90  |
| 30E | 4.8 ± 3.2  | 87.8 ± 9.3  | 3  | 90  |
| 31E | 4.9 ± 4.1  | 87.8 ± 9.3  | 4  | 90  |
| 1F  | 1.4 ± 1.5  | 85.0 ± 9.4  | 1  | 80  |
| 2F  | 2.9 ± 2.3  | 85.0 ± 9.4  | 2  | 80  |
| 3F  | 2.9 ± 2.0  | 85.0 ± 9.4  | 1  | 80  |
| 4F  | 2.4 ± 2.3  | 75.3 ± 1.1  | 4  | 75  |
| 5F  | 4.8 ± 3.3  | 75.3 ± 1.1  | 5  | 75  |
| 6F  | 5.0 ± 3.1  | 75.3 ± 1.1  | 2  | 75  |
| 7F  | 3.6 ± 2.5  | 75.3 ± 1.1  | 2  | 75  |
| 8F  | 8.7 ± 3.6  | 75.3 ± 1.1  | 8  | 75  |
| 9F  | 7.8 ± 3.9  | 75.1 ± 0.6  | 12 | 75  |
| 10F | 10.8 ± 3.4 | 75.1 ± 0.6  | 7  | 75  |
| 11F | 10.2 ± 3.5 | 75.1 ± 0.6  | 11 | 75  |
| 12F | 19.3 ± 3.3 | 75.1 ± 0.6  | 17 | 75  |
| 13F | 13.6 ± 3.7 | 75.1 ± 0.6  | 13 | 75  |
| 14F | 8.7 ± 3.4  | 105.0 ± 2.8 | 4  | 105 |



|     |            |              |    |     |
|-----|------------|--------------|----|-----|
| 15F | 13.1 ± 4.0 | 105.0 ± 2.8  | 22 | 105 |
| 16F | 23.4 ± 3.5 | 105.0 ± 2.8  | 22 | 105 |
| 17F | 23.7 ± 4.6 | 105.0 ± 2.8  | 29 | 105 |
| 18F | 30.1 ± 4.4 | 105.0 ± 2.8  | 32 | 105 |
| 19F | 18.4 ± 4.2 | 106.3 ± 3.9  | 22 | 100 |
| 20F | 9.1 ± 4.8  | 106.3 ± 3.9  | 15 | 100 |
| 21F | 4.4 ± 3.8  | 106.3 ± 3.9  | 3  | 100 |
| 22F | 5.6 ± 4.4  | 106.3 ± 3.9  | 2  | 100 |
| 23F | 4.1 ± 3.4  | 106.3 ± 3.9  | 3  | 100 |
| 24F | 2.2 ± 2.1  | 93.1 ± 12.2  | 3  | 110 |
| 25F | 2.6 ± 2.7  | 93.1 ± 12.2  | 1  | 110 |
| 26F | 3.2 ± 2.7  | 93.1 ± 12.2  | 0  | 110 |
| 27F | 2.5 ± 2.5  | 93.1 ± 12.2  | 2  | 110 |
| 28F | 3.4 ± 2.8  | 93.1 ± 12.2  | 7  | 110 |
| 29F | 2.5 ± 2.4  | 87.8 ± 9.3   | 0  | 90  |
| 30F | 2.9 ± 2.2  | 87.8 ± 9.3   | 0  | 90  |
| 31F | 3.2 ± 2.9  | 87.8 ± 9.3   | 0  | 90  |
| 1G  | 1.6 ± 1.4  | 85.2 ± 10.5  | 2  | 75  |
| 2G  | 3.4 ± 2.7  | 85.2 ± 10.5  | 0  | 75  |
| 3G  | 2.6 ± 2.1  | 85.2 ± 10.5  | 8  | 75  |
| 4G  | 2.9 ± 2.7  | 80.5 ± 7.6   | 1  | 80  |
| 5G  | 3.0 ± 2.4  | 80.5 ± 7.6   | 1  | 80  |
| 6G  | 1.6 ± 1.8  | 80.5 ± 7.6   | 0  | 80  |
| 7G  | 3.8 ± 2.4  | 80.5 ± 7.6   | 5  | 80  |
| 8G  | 5.8 ± 3.2  | 80.5 ± 7.6   | 5  | 80  |
| 9G  | 3.8 ± 2.8  | 77.3 ± 2.9   | 6  | 75  |
| 10G | 7.4 ± 3.5  | 77.3 ± 2.9   | 9  | 75  |
| 11G | 10.7 ± 3.5 | 77.3 ± 2.9   | 15 | 75  |
| 12G | 15.1 ± 2.8 | 77.3 ± 2.9   | 15 | 75  |
| 13G | 14.5 ± 3.7 | 77.3 ± 2.9   | 12 | 75  |
| 14G | 8.7 ± 4.1  | 75.0 ± 0.5   | 9  | 75  |
| 15G | 18.6 ± 3.8 | 75.0 ± 0.5   | 16 | 75  |
| 16G | 24.6 ± 3.6 | 75.0 ± 0.5   | 22 | 75  |
| 17G | 24.2 ± 4.2 | 75.0 ± 0.5   | 21 | 75  |
| 18G | 23.9 ± 4.9 | 75.0 ± 0.5   | 26 | 75  |
| 19G | 20.0 ± 4.9 | 107.2 ± 4.0  | 17 | 110 |
| 20G | 13.3 ± 4.9 | 107.2 ± 4.0  | 17 | 110 |
| 21G | 5.9 ± 4.3  | 107.2 ± 4.0  | 11 | 110 |
| 22G | 5.8 ± 4.7  | 107.2 ± 4.0  | 20 | 110 |
| 23G | 4.8 ± 3.3  | 107.2 ± 4.0  | 3  | 110 |
| 24G | 3.0 ± 2.8  | 96.0 ± 10.5  | 0  | 85  |
| 25G | 2.0 ± 2.0  | 96.0 ± 10.5  | 1  | 85  |
| 26G | 2.2 ± 2.1  | 96.0 ± 10.5  | 1  | 85  |
| 27G | 3.4 ± 2.8  | 96.0 ± 10.5  | 5  | 85  |
| 28G | 2.7 ± 2.4  | 96.0 ± 10.5  | 2  | 85  |
| 29G | 1.9 ± 1.8  | 100.1 ± 10.9 | 2  | 105 |
| 30G | 3.0 ± 2.9  | 100.1 ± 10.9 | 3  | 105 |
| 31G | 3.3 ± 3.0  | 100.1 ± 10.9 | 1  | 105 |
| 1H  | 1.5 ± 1.6  | 85.2 ± 10.5  | 1  | 75  |
| 2H  | 2.6 ± 2.3  | 85.2 ± 10.5  | 2  | 75  |
| 3H  | 1.6 ± 2.0  | 85.2 ± 10.5  | 1  | 75  |
| 4H  | 1.5 ± 1.5  | 80.5 ± 7.6   | 2  | 80  |
| 5H  | 0.7 ± 1.0  | 80.5 ± 7.6   | 1  | 80  |
| 6H  | 1.9 ± 1.8  | 80.5 ± 7.6   | 0  | 80  |
| 7H  | 4.1 ± 3.4  | 80.5 ± 7.6   | 4  | 80  |
| 8H  | 6.4 ± 3.4  | 80.5 ± 7.6   | 6  | 80  |
| 9H  | 6.6 ± 2.9  | 77.3 ± 2.9   | 8  | 75  |
| 10H | 4.4 ± 3.6  | 77.3 ± 2.9   | 1  | 75  |
| 11H | 8.9 ± 3.7  | 77.3 ± 2.9   | 8  | 75  |

|     |            |              |     |     |
|-----|------------|--------------|-----|-----|
| 12H | 10.8 ± 3.6 | 77.3 ± 2.9   | 9   | 75  |
| 13H | 7.7 ± 3.9  | 77.3 ± 2.9   | 6   | 75  |
| 14H | 7.9 ± 3.2  | 75.0 ± 0.5   | 6   | 75  |
| 15H | 16.7 ± 4.4 | 75.0 ± 0.5   | 13  | 75  |
| 16H | 22.8 ± 3.1 | 75.0 ± 0.5   | 28  | 75  |
| 17H | 23.0 ± 4.5 | 75.0 ± 0.5   | 25  | 75  |
| 18H | 13.8 ± 5.9 | 75.0 ± 0.5   | 21  | 75  |
| 19H | 19.2 ± 5.6 | 107.2 ± 4.0  | 14  | 110 |
| 20H | 16.5 ± 6.2 | 107.2 ± 4.0  | 6   | 110 |
| 21H | 4.4 ± 3.3  | 107.2 ± 4.0  | 1   | 110 |
| 22H | 4.6 ± 3.0  | 107.2 ± 4.0  | 4   | 110 |
| 23H | 5.0 ± 3.7  | 107.2 ± 4.0  | 2   | 110 |
| 24H | 3.3 ± 3.2  | 96.0 ± 10.5  | 6   | 85  |
| 25H | 2.2 ± 2.2  | 96.0 ± 10.5  | 1   | 85  |
| 26H | 2.7 ± 2.6  | 96.0 ± 10.5  | 0   | 85  |
| 27H | 3.1 ± 2.8  | 96.0 ± 10.5  | 3   | 85  |
| 28H | 2.2 ± 2.4  | 96.0 ± 10.5  | 5   | 85  |
| 29H | 2.9 ± 3.3  | 100.1 ± 10.9 | 4   | 105 |
| 30H | 4.2 ± 3.8  | 100.1 ± 10.9 | 4   | 105 |
| 31H | 3.9 ± 3.3  | 100.1 ± 10.9 | 2   | 105 |
| 1I  | 1.7 ± 1.7  | 85.2 ± 10.5  | 1   | 75  |
| 2I  | 1.6 ± 1.8  | 85.2 ± 10.5  | 2 7 | 5   |
| 3I  | 1.2 ± 1.3  | 85.2 ± 10.5  | 1   | 75  |
| 4I  | 1.3 ± 1.6  | 80.5 ± 7.6   | 0   | 80  |
| 5I  | 1.8 ± 1.9  | 80.5 ± 7.6   | 1   | 80  |
| 6I  | 1.8 ± 1.8  | 80.5 ± 7.6   | 4   | 80  |
| 7I  | 2.4 ± 2.3  | 80.5 ± 7.6   | 2   | 80  |
| 8I  | 2.0 ± 2.2  | 80.5 ± 7.6   | 1   | 80  |
| 9I  | 3.4 ± 2.5  | 77.3 ± 2.9   | 4   | 75  |
| 10I | 3.2 ± 2.6  | 77.3 ± 2.9   | 3   | 75  |
| 11I | 6.2 ± 3.9  | 77.3 ± 2.9   | 10  | 75  |
| 12I | 10.5 ± 4.8 | 77.3 ± 2.9   | 9   | 75  |
| 13I | 7.9 ± 3.9  | 77.3 ± 2.9   | 4   | 75  |
| 14I | 10.6 ± 4.0 | 75.0 ± 0.5   | 5   | 75  |
| 15I | 15.7 ± 5.2 | 75.0 ± 0.5   | 19  | 75  |
| 16I | 21.7 ± 6.0 | 75.0 ± 0.5   | 21  | 75  |
| 17I | 19.8 ± 4.8 | 75.0 ± 0.5   | 12  | 75  |
| 18I | 12.0 ± 4.8 | 75.0 ± 0.5   | 16  | 75  |
| 19I | 19.2 ± 5.8 | 107.2 ± 4.0  | 26  | 110 |
| 20I | 15.7 ± 4.9 | 107.2 ± 4.0  | 14  | 110 |
| 21I | 3.4 ± 3.3  | 107.2 ± 4.0  | 1   | 110 |
| 22I | 4.4 ± 3.5  | 107.2 ± 4.0  | 3   | 110 |
| 23I | 5.4 ± 3.4  | 107.2 ± 4.0  | 8   | 110 |
| 24I | 3.2 ± 2.4  | 96.0 ± 10.5  | 3   | 85  |
| 25I | 3.5 ± 3.1  | 96.0 ± 10.5  | 3   | 85  |
| 26I | 3.4 ± 2.7  | 96.0 ± 10.5  | 0   | 85  |
| 27I | 3.1 ± 2.5  | 96.0 ± 10.5  | 3   | 85  |
| 28I | 2.7 ± 2.5  | 96.0 ± 10.5  | 4   | 85  |
| 29I | 4.2 ± 3.4  | 100.1 ± 10.9 | 2   | 105 |
| 30I | 5.0 ± 4.5  | 100.1 ± 10.9 | 7   | 105 |
| 31I | 3.5 ± 2.8  | 100.1 ± 10.9 | 2   | 105 |
| 1J  | 1.4 ± 1.7  | 85.2 ± 10.5  | 0   | 75  |
| 2J  | 1.7 ± 1.8  | 85.2 ± 10.5  | 0   | 75  |
| 3J  | 2.1 ± 2.0  | 85.2 ± 10.5  | 1   | 75  |
| 4J  | 1.4 ± 1.5  | 80.5 ± 7.6   | 1   | 80  |
| 5J  | 1.1 ± 1.3  | 80.5 ± 7.6   | 0   | 80  |
| 6J  | 1.6 ± 1.9  | 80.5 ± 7.6   | 0   | 80  |
| 7J  | 1.1 ± 1.3  | 80.5 ± 7.6   | 0   | 80  |
| 8J  | 0.8 ± 1.2  | 80.5 ± 7.6   | 0   | 80  |

|     |            |              |    |     |
|-----|------------|--------------|----|-----|
| 9J  | 0.4 ± 0.6  | 77.3 ± 2.9   | 1  | 75  |
| 10J | 0.9 ± 1.1  | 77.3 ± 2.9   | 2  | 75  |
| 11J | 3.3 ± 2.8  | 77.3 ± 2.9   | 5  | 75  |
| 12J | 3.2 ± 2.6  | 77.3 ± 2.9   | 0  | 75  |
| 13J | 4.6 ± 3.0  | 77.3 ± 2.9   | 5  | 75  |
| 14J | 8.2 ± 3.9  | 75.0 ± 0.5   | 2  | 75  |
| 15J | 11.3 ± 4.4 | 75.0 ± 0.5   | 22 | 75  |
| 16J | 14.3 ± 4.4 | 75.0 ± 0.5   | 16 | 75  |
| 17J | 9.5 ± 5.0  | 75.0 ± 0.5   | 8  | 75  |
| 18J | 3.2 ± 2.8  | 75.0 ± 0.5   | 3  | 75  |
| 19J | 6.8 ± 4.8  | 107.2 ± 4.0  | 0  | 110 |
| 20J | 7.3 ± 5.3  | 107.2 ± 4.0  | 13 | 110 |
| 21J | 3.9 ± 3.1  | 107.2 ± 4.0  | 3  | 110 |
| 22J | 5.4 ± 4.2  | 107.2 ± 4.0  | 11 | 110 |
| 23J | 4.0 ± 3.1  | 107.2 ± 4.0  | 1  | 110 |
| 24J | 2.9 ± 2.5  | 96.0 ± 10.5  | 5  | 85  |
| 25J | 3.6 ± 3.2  | 96.0 ± 10.5  | 7  | 85  |
| 26J | 4.8 ± 3.5  | 96.0 ± 10.5  | 8  | 85  |
| 27J | 4.6 ± 4.0  | 96.0 ± 10.5  | 6  | 85  |
| 28J | 5.4 ± 3.7  | 96.0 ± 10.5  | 1  | 85  |
| 29J | 5.9 ± 3.7  | 100.1 ± 10.9 | 2  | 105 |
| 30J | 5.4 ± 4.2  | 100.1 ± 10.9 | 2  | 105 |
| 31J | 3.5 ± 3.4  | 100.1 ± 10.9 | 5  | 105 |
| 1K  | 1.9 ± 1.9  | 85.2 ± 10.5  | 2  | 75  |
| 2K  | 2.3 ± 2.1  | 85.2 ± 10.5  | 3  | 75  |
| 3K  | 3.1 ± 2.8  | 85.2 ± 10.5  | 7  | 75  |
| 4K  | 2.4 ± 1.9  | 80.5 ± 7.6   | 2  | 80  |
| 5K  | 1.2 ± 1.5  | 80.5 ± 7.6   | 0  | 80  |
| 6K  | 1.4 ± 1.6  | 80.5 ± 7.6   | 4  | 80  |
| 7K  | 1.6 ± 1.7  | 80.5 ± 7.6   | 5  | 80  |
| 8K  | 1.4 ± 1.6  | 80.5 ± 7.6   | 1  | 80  |
| 9K  | 0.8 ± 0.9  | 77.3 ± 2.9   | 0  | 75  |
| 10K | 0.9 ± 1.1  | 77.3 ± 2.9   | 0  | 75  |
| 11K | 2.1 ± 1.9  | 77.3 ± 2.9   | 2  | 75  |
| 12K | 2.7 ± 3.1  | 77.3 ± 2.9   | 0  | 75  |
| 13K | 2.9 ± 2.8  | 77.3 ± 2.9   | 1  | 75  |
| 14K | 4.1 ± 3.2  | 75.0 ± 0.5   | 5  | 75  |
| 15K | 6.9 ± 4.6  | 75.0 ± 0.5   | 8  | 75  |
| 16K | 13.4 ± 4.9 | 75.0 ± 0.5   | 12 | 75  |
| 17K | 15.2 ± 5.2 | 75.0 ± 0.5   | 11 | 75  |
| 18K | 7.2 ± 4.3  | 75.0 ± 0.5   | 10 | 75  |
| 19K | 7.8 ± 4.9  | 107.2 ± 4.0  | 4  | 110 |
| 20K | 3.3 ± 3.1  | 107.2 ± 4.0  | 1  | 110 |
| 21K | 2.7 ± 3.0  | 107.2 ± 4.0  | 4  | 110 |
| 22K | 5.5 ± 4.3  | 107.2 ± 4.0  | 9  | 110 |
| 23K | 5.2 ± 4.3  | 107.2 ± 4.0  | 2  | 110 |
| 24K | 5.5 ± 3.8  | 96.0 ± 10.5  | 4  | 85  |
| 25K | 4.3 ± 3.3  | 96.0 ± 10.5  | 8  | 85  |
| 26K | 5.6 ± 4.3  | 96.0 ± 10.5  | 5  | 85  |
| 27K | 4.9 ± 4.1  | 96.0 ± 10.5  | 7  | 85  |
| 28K | 5.6 ± 4.5  | 96.0 ± 10.5  | 6  | 85  |
| 29K | 4.6 ± 3.9  | 100.1 ± 10.9 | 3  | 105 |
| 30K | 3.7 ± 3.3  | 100.1 ± 10.9 | 2  | 105 |
| 31K | 1.5 ± 1.7  | 100.1 ± 10.9 | 1  | 105 |
| 1L  | 1.1 ± 1.4  | 97.1 ± 11.5  | 1  | 80  |
| 2L  | 1.6 ± 1.7  | 97.1 ± 11.5  | 1  | 80  |
| 3L  | 1.2 ± 1.1  | 90.2 ± 11.1  | 1  | 100 |
| 4L  | 0.3 ± 0.6  | 90.2 ± 11.1  | 0  | 100 |
| 5L  | 0.4 ± 0.6  | 90.2 ± 11.1  | 2  | 100 |

|     |           |             |   |     |
|-----|-----------|-------------|---|-----|
| 6L  | 0.1 ± 0.3 | 88.6 ± 11.2 | 0 | 105 |
| 7L  | 0.4 ± 0.7 | 88.6 ± 11.2 | 0 | 105 |
| 8L  | 0.3 ± 0.7 | 88.6 ± 11.2 | 0 | 105 |
| 9L  | 1.1 ± 1.4 | 84.8 ± 9.6  | 0 | 75  |
| 10L | 2.5 ± 2.4 | 84.8 ± 9.6  | 1 | 75  |
| 11L | 3.3 ± 2.8 | 84.8 ± 9.6  | 9 | 75  |
| 12L | 1.3 ± 1.6 | 96.3 ± 11.6 | 0 | 110 |
| 13L | 1.0 ± 1.1 | 96.3 ± 11.6 | 1 | 110 |
| 14L | 3.4 ± 3.1 | 96.3 ± 11.6 | 6 | 110 |
| 15L | 2.1 ± 2.1 | 88.9 ± 11.6 | 4 | 105 |
| 16L | 1.8 ± 2.3 | 88.9 ± 11.6 | 1 | 105 |
| 17L | 1.9 ± 2.3 | 88.9 ± 11.6 | 1 | 105 |
| 18L | 0.8 ± 1.0 | 88.1 ± 10.4 | 0 | 95  |
| 19L | 1.4 ± 1.7 | 88.1 ± 10.4 | 0 | 95  |
| 1M  | 1.6 ± 1.6 | 97.1 ± 11.5 | 0 | 80  |
| 2M  | 1.3 ± 1.6 | 97.1 ± 11.5 | 1 | 80  |
| 3M  | 0.5 ± 0.7 | 90.2 ± 11.1 | 0 | 100 |
| 4M  | 0.4 ± 0.7 | 90.2 ± 11.1 | 0 | 100 |
| 5M  | 0.4 ± 0.7 | 90.2 ± 11.1 | 0 | 100 |
| 6M  | 0.4 ± 0.6 | 88.6 ± 11.2 | 0 | 105 |
| 7M  | 0.7 ± 1.1 | 88.6 ± 11.2 | 2 | 105 |
| 8M  | 0.6 ± 0.8 | 88.6 ± 11.2 | 0 | 105 |
| 9M  | 0.9 ± 1.1 | 84.8 ± 9.6  | 1 | 75  |
| 10M | 0.9 ± 1.1 | 84.8 ± 9.6  | 0 | 75  |
| 11M | 0.7 ± 1.1 | 84.8 ± 9.6  | 1 | 75  |
| 12M | 1.0 ± 1.2 | 96.3 ± 11.6 | 2 | 110 |
| 13M | 1.0 ± 1.6 | 96.3 ± 11.6 | 1 | 110 |
| 14M | 0.9 ± 1.4 | 96.3 ± 11.6 | 3 | 110 |
| 15M | 0.9 ± 0.9 | 88.9 ± 11.6 | 1 | 105 |
| 16M | 0.8 ± 1.0 | 88.9 ± 11.6 | 3 | 105 |
| 17M | 1.2 ± 1.5 | 88.9 ± 11.6 | 3 | 105 |
| 18M | 1.5 ± 1.6 | 88.1 ± 10.4 | 2 | 95  |
| 19M | 1.8 ± 2.5 | 88.1 ± 10.4 | 1 | 95  |
| 1N  | 1.4 ± 1.5 | 97.1 ± 11.5 | 0 | 80  |
| 2N  | 0.7 ± 1.0 | 97.1 ± 11.5 | 1 | 80  |
| 3N  | 0.6 ± 0.9 | 90.2 ± 11.1 | 2 | 100 |
| 4N  | 0.6 ± 0.8 | 90.2 ± 11.1 | 0 | 100 |
| 5N  | 0.5 ± 0.8 | 90.2 ± 11.1 | 0 | 100 |
| 6N  | 0.9 ± 1.3 | 88.6 ± 11.2 | 0 | 105 |
| 7N  | 1.5 ± 1.8 | 88.6 ± 11.2 | 1 | 105 |
| 8N  | 1.8 ± 1.9 | 88.6 ± 11.2 | 1 | 105 |
| 9N  | 1.1 ± 1.3 | 84.8 ± 9.6  | 1 | 75  |
| 10N | 2.5 ± 2.7 | 84.8 ± 9.6  | 2 | 75  |
| 11N | 2.1 ± 2.0 | 84.8 ± 9.6  | 2 | 75  |
| 12N | 2.5 ± 2.7 | 96.3 ± 11.6 | 0 | 110 |
| 13N | 1.8 ± 2.2 | 96.3 ± 11.6 | 1 | 110 |
| 14N | 1.8 ± 2.1 | 96.3 ± 11.6 | 2 | 110 |
| 15N | 0.8 ± 1.1 | 88.9 ± 11.6 | 1 | 105 |
| 16N | 1.3 ± 1.5 | 88.9 ± 11.6 | 2 | 105 |
| 17N | 1.4 ± 1.5 | 88.9 ± 11.6 | 1 | 105 |
| 18N | 1.6 ± 2.0 | 88.1 ± 10.4 | 1 | 95  |
| 19N | 2.4 ± 2.3 | 88.1 ± 10.4 | 6 | 95  |

**Supplementary Table S4 - Tsunami Stations.**

| Station                                   | Lon (°E)   | Lat (°N)  | Sampling (min) | Weight | Source | Abbrev. |
|-------------------------------------------|------------|-----------|----------------|--------|--------|---------|
| DART 21419                                | 155.736    | 44.455    | 1              | 2      | a      | D21419  |
| DART 21401                                | 152.583    | 42.617    | 1              | 2      | b      | D21401  |
| DART 21418                                | 148.694    | 38.711    | 1              | 2.5    | a      | D21418  |
| DART 21413                                | 152.117    | 30.515    | 1              | 2      | a      | D21413  |
| Tsunami Sensor PG1 Off<br>Kushiro-Tokachi | 144.4375   | 41.7040   | 0.5            | 1      | c      | KPG1    |
| Tsunami Sensor PG2 Off<br>Kushiro-Tokachi | 144.8485   | 42.2365   | 0.5            | 1      | c      | KPG2    |
| Coastal Wave Gauge 602                    | 141.446111 | 42.544167 | 0.5            | 0.75   | d      | C602    |
| Coastal Wave Gauge 202                    | 141.424167 | 40.925    | 0.5            | 1      | d      | C202    |
| GPS-Buoy 807                              | 142.066666 | 40.116666 | 0.5            | 1.5    | d      | G807    |
| GPS-Buoy 804                              | 142.186666 | 39.627222 | 0.5            | 1.5    | d      | G804    |
| GPS-Buoy 802                              | 142.096944 | 39.258611 | 0.5            | 1.5    | d      | G802    |
| Tsunami Sensor 1 off Kamaishi             | 142.768    | 39.232    | 0.5            | 2      | e*     | TM1     |
| Tsunami Sensor 2 off Kamaishi             | 142.445    | 39.250    | 0.5            | 2      | e*     | TM2     |
| GPS-Buoy 803                              | 141.894444 | 38.857777 | 0.5            | 1.5    | d      | G803    |
| Tsunami Sensor P06                        | 142.5838   | 38.634    | 0.5            | 2.0    | e*     | P06     |
| Tsunami Sensor P02                        | 142.5016   | 38.5002   | 0.5            | 2.0    | e*     | P02     |
| Coastal Wave Gauge 205                    | 141.066111 | 38.25     | 0.5            | 1      | d      | C205    |
| GPS-Buoy 801                              | 141.683611 | 38.2325   | 0.5            | 1.5    | d      | G801    |
| GPS-Buoy 806                              | 141.18555  | 36.971388 | 0.5            | 1.5    | d      | G806    |
| Boso                                      | 140.76     | 34.75     | 1              | 1.5    | f      | Boso    |
| Tokai                                     | 137.59     | 33.77     | 1              | 0.75   | f      | Tokai   |
| Tsunami Sensor PG1 Off<br>Muroto Cape     | 134.4753   | 32.3907   | 0.5            | 0.75   | c      | MPG1    |
| Tsunami Sensor PG2 Off<br>Muroto Cape     | 134.3712   | 32.6431   | 0.5            | 0.75   | c      | MPG2    |

- a) *National Oceanic and Atmospheric Administration (NOAA)*
- b) *Russian Far Eastern Regional Hydrometeorological Research Institute (RFERHRI)*
- c) *Japan Agency for Marine-Earth Science and Technology (JAMSTEC)*
- d) *Nationwide Ocean Wave information network for Ports and Harbours (NOWPHAS)*
- e) *Earthquake Research Institute (ERI) at the University of Tokyo*
- f) *Japan Meteorological Agency (JMA)*

\* Data digitized ([http://outreach.eri.u-tokyo.ac.jp/eqvolc/201103\\_tohoku/eng/#sealevel](http://outreach.eri.u-tokyo.ac.jp/eqvolc/201103_tohoku/eng/#sealevel))

## References

- 1) Piatanesi, A., & Lorito, S., Rupture process of the 2004 Sumatra-Andaman earthquake from tsunami waveform inversion. *Bull. Seismol. Soc. Am.*, **97**(1A), S223–S231, doi:10.1785/0120050627, (2007).
- 2) Cirella, A., Piatanesi, A., Tinti, E., & Cocco, M., Rupture process of the 2007 Niigata-ken Chuetsu-oki earthquake by non-linear joint inversion of strong motion and GPS data. *Geophys. Res. Lett.*, **35**, L16306, doi:10.1029/2008GL034756, (2008).
- 3) Lorito, S., Romano, F., Piatanesi, A., & Boschi, E., Source process of the September 12, 2007, Mw 8.4, southern Sumatra earthquake from tsunami tide gauge record inversion. *Geophys. Res. Lett.*, **35**, L02310, doi:10.1029/2007GL032661, (2008).
- 4) Romano, F., Piatanesi, A., Lorito, S., & Hirata, K., Slip distribution of the 2003 Tokachi-oki Mw 8.1 earthquake from joint inversion of tsunami waveforms and geodetic data. *J. Geophys. Res.*, **115**, B11313, doi:10.1029/2009JB006665, (2010).
- 5) Lorito, S. et al., Limited overlap between the seismic gap and the coseismic slip of the great 2010 Chile earthquake. *Nature Geoscience*, **4**, 173-177, doi:10.1038/NGEO1073, (2011).
- 6) Romano, F. et al., Scientific Reports, **2**, 385, doi:10.1038/srep00385, (2012).
- 7) Rothman, D., Automatic estimation of large residual statics corrections. *Geophysics*, **51**, 332–346, doi:10.1190/1.1442092, (1986).
- 8) Sen, M., & Stoffa, P. L., Nonlinear one-dimensional seismic waveform inversion using simulated annealing. *Geophysics*, **56**, 1624–1638, doi:10.1190/1.1442973, (1991).
- 9) Spudich, P., & Miller, D. P., Seismic site effects and the spatial interpolation of earthquake seismograms: results using aftershocks of the 1986 North Palm Springs, California, earthquake. *Bull. Seismol. Soc. Am.*, **80**, 6, 1504-1532, (1990).

- 10) Hooper, A. et al., Importance of horizontal seafloor motion on tsunami height for the 2011 Mw9.0 Tohoku-Oki earthquake. *Earth Planet. Sc. Lett.*, **361**, 469-479, doi:10.1016/j.epsl.2012.11.013, (2013).
- 11) Kato, T. et al., Tsunami due to the 2004 September 5th off the Kii Peninsula earthquake, Japan, recorded by a new GPS buoy. *Earth, Planets Space*, **57**, 279-301, (2005).
- 12) Nagai, T., Development and Improvement of the Japanese coastal wave observation network (NOWPHAS). *J. Jpn. Soc. Civil. Eng.*, no. **609** (VI-41), 1-14, (1998), in Japanese.
- 13) Momma, H. et al., Monitoring System for Submarine Earthquakes and Deep Sea Environment. *Proc. MTS/IEEE OCEANS '97*, **2**, 1453-1459, (1997).
- 14) Hirata, K. et al., Real-time geophysical measurements on the deep seafloor using submarine cable in the southern Kurile subduction zone. *IEEE J. Ocean Eng.*, **27**, 170-181, doi:10.1109/JOE.2002.1002471, (2002).
- 15) Fujisawa, I., Tateyama, S., & Fujisaki, J., Permanent ocean-bottom earthquake and tsunami observation system off the Boso Peninsula. *Weath. Serv. Bull.*, **53**, 127-166, (1986), in Japanese.
- 16) Kanazawa, T., & Hasegawa, A., Ocean-bottom observatory for earthquakes and tsunami off Sanriku, north-east Japan using submarine cable. *International Workshop on Scientific Use of Submarine Cables, Comm. For Sci. Use of Submarine Cables, Okinawa, Japan*, (1997).
- 17) Iinuma, T. et al., Coseismic slip distribution of the 2011 off the Pacific Coast of Tohoku Earthquake (M9.0) refined by means of seafloor geodetic data. *J. Geophys. Res.*, **117**, B07409, doi:10.1029/2012JB009186, (2012).
- 18) Miura, S. et al., Structural characteristics off Miyagi forearc region, the Japan Trench seismogenic zone, deduced from a wide-angle reflection and refraction study. *Tectonophysics*, **407**, 165–188, doi:10.1016/j.tecto.2005.08.001, (2005).
- 19) Barbosa, S. M., Fernandes, M. J., & Silva, M. E.. Nonlinear sea level trends from European tide gauge records. *Ann. Geophys.*, **22**, 1465–1472, (2004).



- 20) Bellahsen, N., Faccenna, C., & Funiciello, F., Dynamics of subduction and plate motion in laboratory experiments: Insights into the “plate tectonics” behavior of the Earth. *J. Geophys. Res.*, **110**, B01401, doi:10.1029/2004JB002999, (2005).
- 21) Tsuru, T. et al., Tectonic features of the Japan Trench convergent margin off Sanriku, northeastern Japan revealed by multi-channel seismic reflection data. *J. Geophys. Res.*, **105**, 16403–16413, (2000).
- 22) Tsuru, T. et al., Along-arc structural variation of the plate boundary at the Japan Trench margin: Implication of interplate coupling. *J. Geophys. Res.*, **107**, B12, 2357, doi:10.1029/2001JB001664, (2002).
- 23) Huang, Z., Zhao, D., & Wang, L., Seismic heterogeneity and anisotropy of the Honshu arc from the Japan Trench to the Japan Sea. *Geophysical Journal International*, **184**, 1428–1444, doi:10.1111/j.1365-246X.2011.04934.x, (2011).

## **Supplementary Figure Legend.**

### **Supplementary Figure S1. Density model.**

NW-SE cross section of the 3D FE model in proximity of the hypocenter, showing the layer subdivision. It must be noted that the layering is associated only to the density (see Table S1). The elastic parameters of the FE model are computed from the velocities of the seismic tomographic model<sup>23</sup> without layering approximation, using the defined density structure. The arrows indicate the depth of the interface between each layer and the slab, which is not constant due to the irregular shape of the slab itself. The thick black line is the active fault. The topographic/bathymetric profile is shown on the top, with vertical exaggeration. Figure S1 is created using GMT software.

### **Supplementary Figure S2. Fault model.**

The fault plane built with the FE model is tessellated with 398 quadrangular subfaults of variable size along dip: 155 subfaults of 24km x 14km (length x width) close to the trench (up to ~15km depth), 186 of 24km side in the central part up to ~40km depth (corresponding to more than 2/3 of the fault surface) and 57 of 35km side in the deeper part. The subfaults are progressively ordered from the northernmost shallowest to the southernmost deepest. The subfaults numbering follows that in Table S2, in order to associate the position on the map to the slip values. Cyan larger quadrilateral identify the zones in which we kept the rake constant. Colorbar indicates the depth variation along the fault surface. Red star indicates the epicentre position. The map is created using GMT software.

**Supplementary Figure S3. Contribution to tsunami amplitudes due to the horizontal seafloor deformation.** Comparison between the observed (black) and predicted tsunami waveforms, including (red) or not including (blue) the contribution of the horizontal seafloor deformation. The figure is created using MATLAB (<http://www.mathworks.it/products/matlab/>).

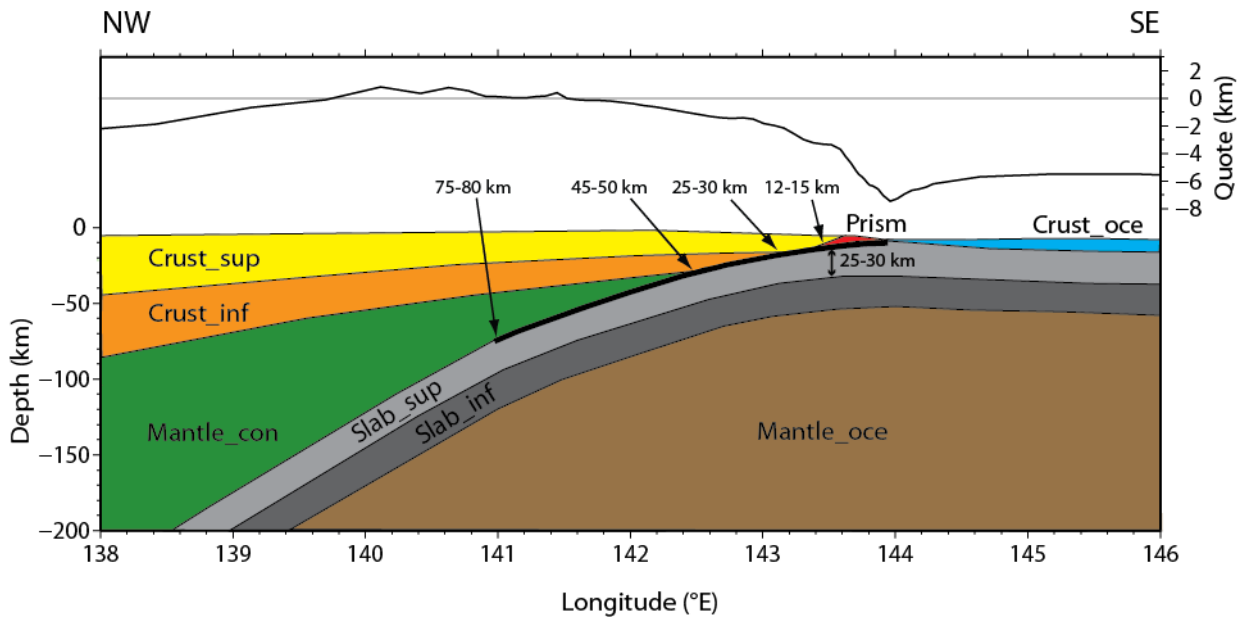

**Figure S1**

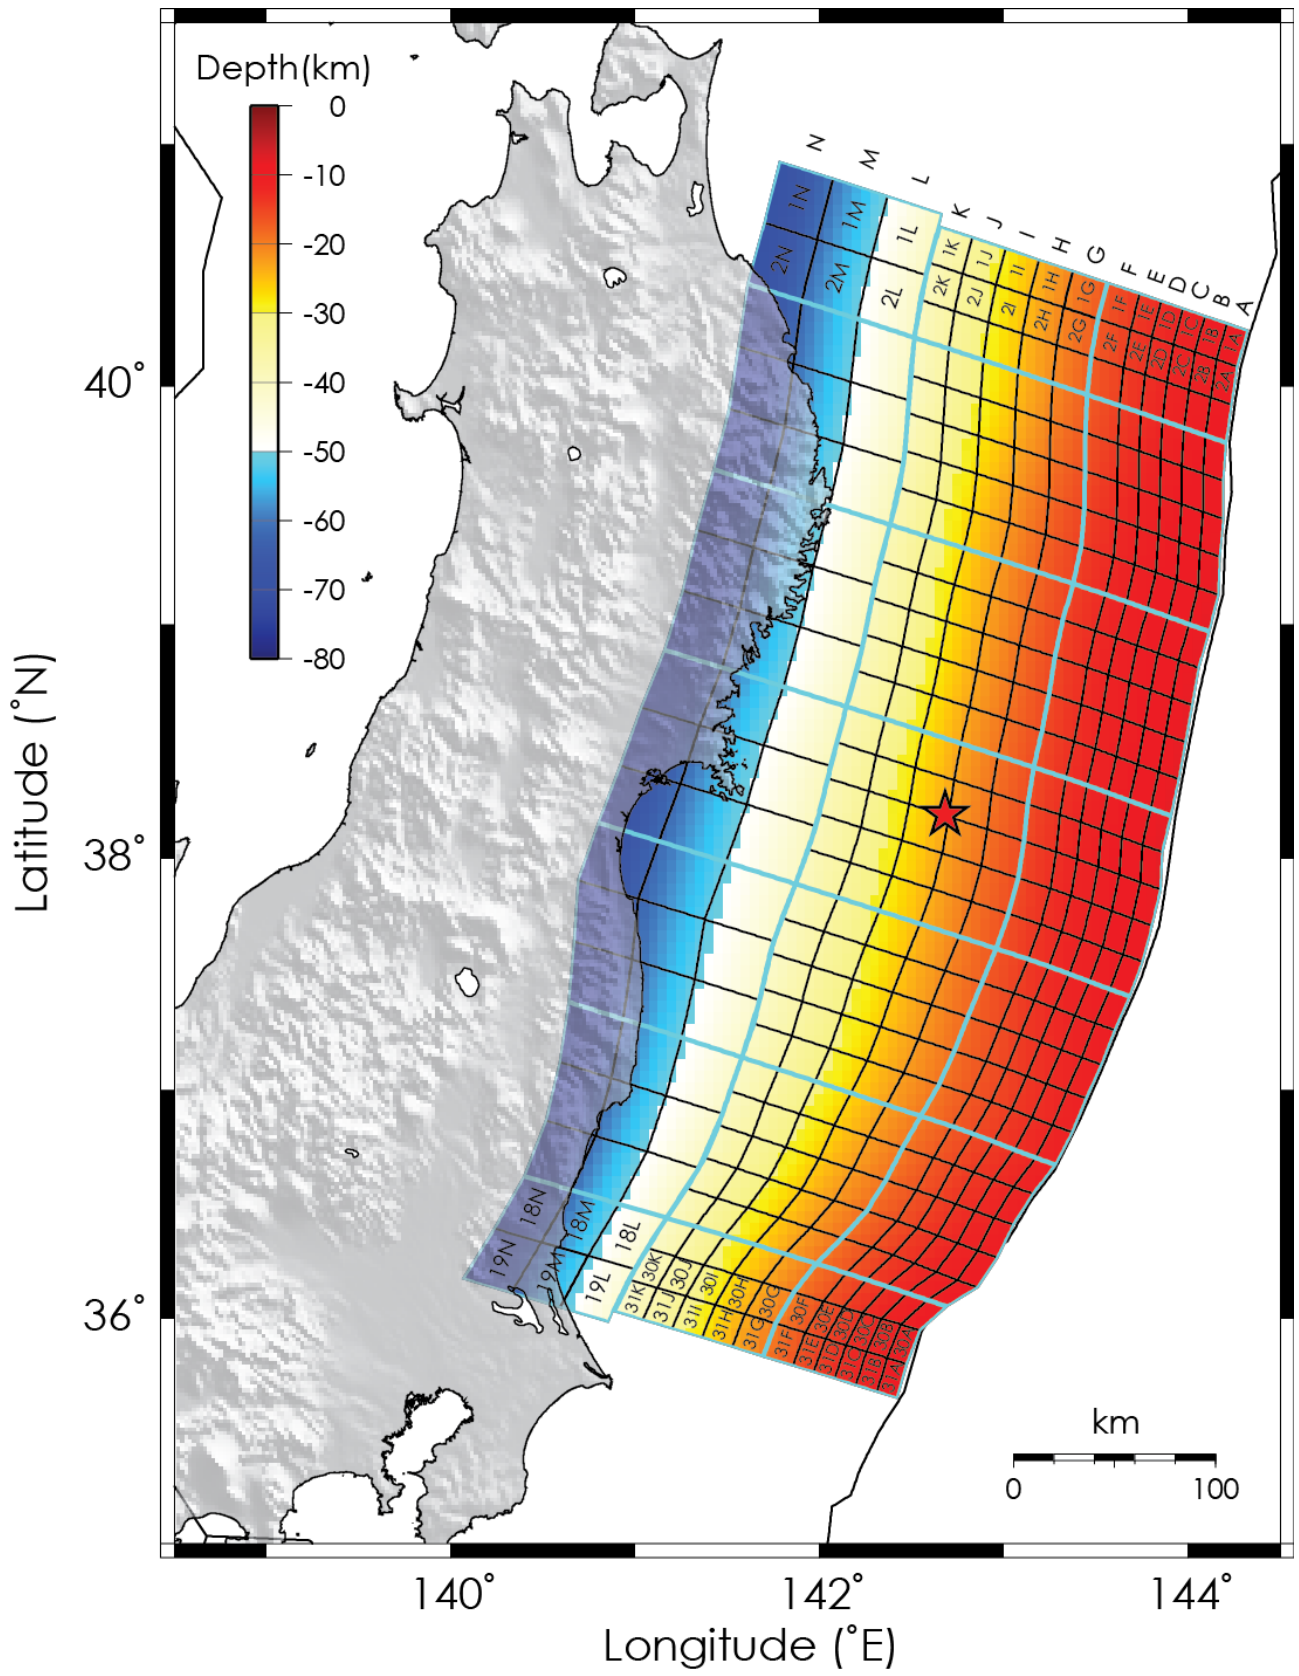

Figure S2

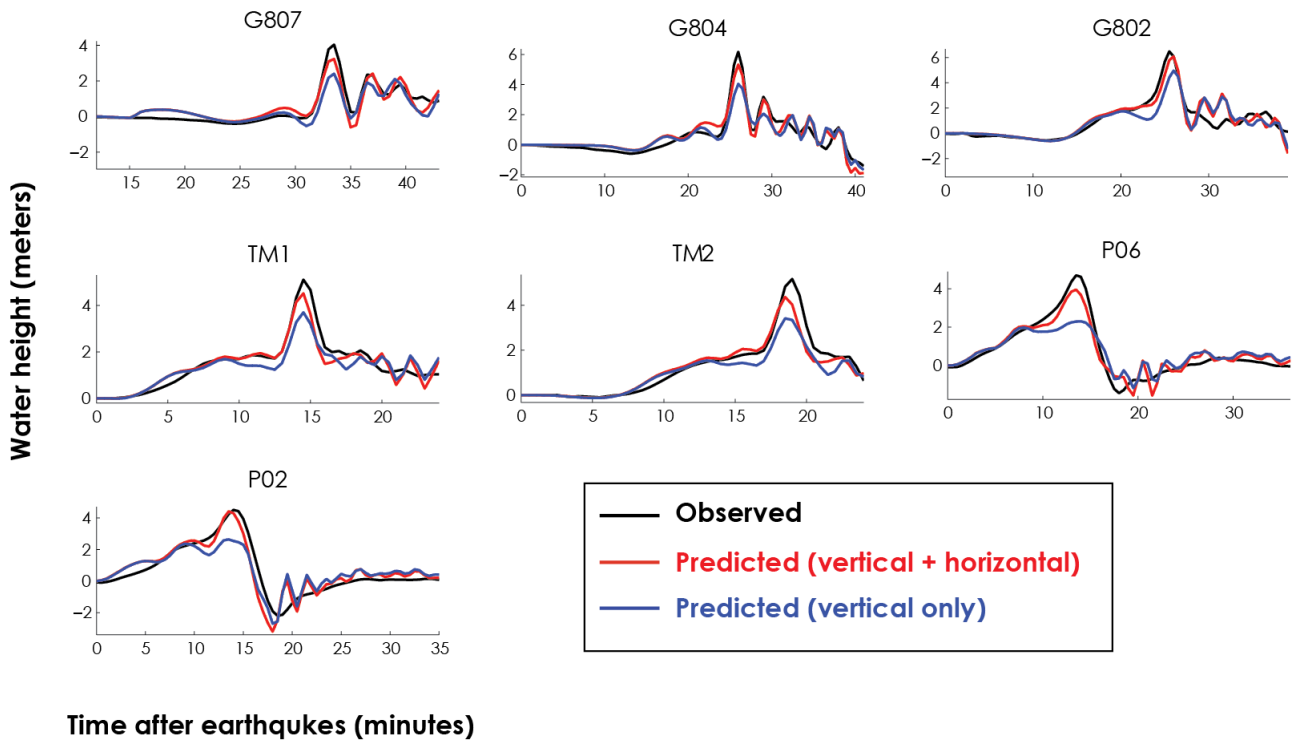

Figure S3
